1 **Intranasal VLP-RBD vaccine adjuvanted with BECC470 confers immunity against**  
2 **Delta SARS-CoV-2 challenge in K18-hACE2-mice**

3

4 Katherine S Lee<sup>1,2</sup>, Nathaniel A Rader<sup>1,2</sup>, Olivia A Miller<sup>2</sup>, Melissa Cooper<sup>2</sup>, Ting Y Wong<sup>1,2</sup>, Md.  
5 Shahrier Amin<sup>3</sup>, Mariette Barbier<sup>1,2</sup>, Justin R Bevere<sup>1,2</sup>, Robert K Ernst<sup>4</sup>, and F. Heath Damron<sup>1,2\*</sup>

6

7 <sup>1</sup> Department of Microbiology, Immunology, and Cell Biology, School of Medicine, West Virginia  
8 University, Morgantown, WV, USA

9 <sup>2</sup> Vaccine Development Center at West Virginia University Health Sciences Center,  
10 Morgantown, WV, USA

11 <sup>3</sup>Department of Pathology, Anatomy, and Laboratory Medicine, West Virginia University,  
12 Morgantown, WV, USA

13 <sup>4</sup>Department of Microbial Pathogenesis, University of Maryland School of Dentistry, Baltimore,  
14 MD, USA

15 \* Corresponding Author

16 Corresponding author email address: [fdamron@hsc.wvu.edu](mailto:fdamron@hsc.wvu.edu)

17

18

19

20

21

## 22 **Abstract**

23 As the COVID-19 pandemic transitions to endemic, seasonal boosters are a plausible reality  
24 across the globe. We hypothesize that intranasal vaccines can provide better protection against  
25 asymptomatic infections and more transmissible variants of SARS-CoV-2. To formulate a  
26 protective intranasal vaccine, we utilized a VLP-based platform. Hepatitis B surface antigen-  
27 based virus like particles (VLP) linked with receptor binding domain (RBD) antigen were paired  
28 with the TLR4-based agonist adjuvant, BECC 470. K18-hACE2 mice were primed and boosted  
29 at four-week intervals with either VLP-RBD-BECC or mRNA-1273. Both VLP-RBD-BECC and  
30 mRNA-1273 vaccination resulted in production of RBD-specific IgA antibodies in serum. RBD-  
31 specific IgA was also detected in the nasal wash and lung supernatants and were highest in  
32 VLP-RBD-BECC vaccinated mice. Interestingly, VLP-RBD-BECC vaccinated mice showed  
33 slightly lower levels of pre-challenge IgG responses, decreased RBD-ACE2 binding inhibition,  
34 and lower neutralizing activity *in vitro* than mRNA-1273 vaccinated mice. Both VLP-RBD-BECC  
35 and mRNA-1273 vaccinated mice were protected against challenge with a lethal dose of Delta  
36 variant SARS-CoV-2. Both vaccines limited viral replication and viral RNA burden in the lungs of  
37 mice. CXCL10 is a biomarker of severe SARS-CoV-2 infection and we observed both vaccines  
38 limited expression of serum and lung CXCL10. Strikingly, VLP-RBD-BECC when administered  
39 intranasally, limited lung inflammation at early timepoints that mRNA-1273 vaccination did not.  
40 VLP-RBD-BECC immunization elicited antibodies that do recognize SARS-CoV-2 Omicron  
41 variant. However, VLP-RBD-BECC immunized mice were protected from Omicron challenge  
42 with low viral burden. Conversely, mRNA-1273 immunized mice had low to no detectable virus  
43 in the lungs at day 2. Together, these data suggest that VLP-based vaccines paired with BECC  
44 adjuvant can be used to induce protective mucosal and systemic responses against SARS-  
45 CoV-2.

46 **Keywords:** Intranasal vaccine, COVID-19 vaccine, Omicron variant, Delta variant, SARS-CoV-  
47 2, K18-hACE2 mice

## 48 **Introduction**

49 Vaccines prepare the immune system to defend against disease-causing agents through a  
50 simulated exposure. Attenuated or inactivated whole-viruses, viral vectors, pathogen proteins,  
51 mRNA, and bacterial toxoids, are all used in vaccine formulas administered to hosts to train the  
52 immune system to adequately fight off pathogens without an authentic exposure or infection.  
53 The immunological memory response that develops from this priming exposure event is  
54 oftentimes highly capable of protecting against severe disease and death. Still, the vaccine-  
55 elicited immune response differs from a natural response to pathogen exposure and may not  
56 always produce superior cellular responses. The intramuscular route of administration is a  
57 popular option for vaccine delivery strategies due to its low incidence of site-specific adverse  
58 reactions, and optimal immunogenicity for a systemic immune response [1]. Blood supply to the  
59 muscles, compared to other tissues, clears adjuvants and other vaccine components more  
60 rapidly, leading to the efficient uptake and spread of antigen through the periphery. Circulating  
61 antigens are then directed to the lymph nodes where they come into contact with antigen  
62 presenting cells (APC) in germinal centers for the generation of antigen-specific T cell and B cell  
63 responses [2].

64 Despite the ability of intramuscular vaccines to induce systemic protection against specific  
65 pathogens, alternate routes of administration have been investigated to improve comfort and  
66 boost the timeframe of protection through elicitation of site-specific immune responses [3,4].  
67 Intranasal vaccination is an attractive delivery route for its ability to recapitulate natural infection  
68 by respiratory pathogens, priming the mucosa—a site otherwise difficult to generate adaptive  
69 immunity in—to provide protection when its needed [5]. There is only one intranasal vaccine  
70 currently approved for human use worldwide—FluMist Quadrivalent—although its use is

71 restricted to healthy, non-pregnant individuals between the ages of 2 and 49 due to concerns  
72 surrounding its immunogenicity and the use of a live-attenuated virus [6]. With eight orally  
73 administered vaccines (the United States have utilized oral vaccines against rotavirus, polio,  
74 and others), this together makes a limited number of whole-virus vaccines that directly target the  
75 mucosal arm of the immune system [7]. We, and others, hypothesize that a protective mucosal  
76 immune response may be the key to ultimate protection against pathogens including SARS-  
77 CoV-2 that primarily target and replicate in the upper respiratory tract's mucosal surfaces.

78 Intranasal COVID-19 vaccines are highly desirable as the COVID-19 pandemic evolves and  
79 persists [5,8,9]. Not only could they circumvent the discomfort occurring after intramuscular  
80 vaccination using the current mRNA-based COVID-19 vaccines, but they may also induce a  
81 superior level of protection. In the case of COVID-19 vaccines, studies have shown that  
82 vaccinated hosts have relatively weak neutralizing antibody responses against multiple SARS-  
83 CoV-2 variants compared to convalescent patients [10]. Specifically, the utilization of  
84 intramuscular mRNA vaccines now and into the future as seasonal boosters poses an even  
85 bigger problem as it does little to induce mucosal respiratory immunity that is integral to  
86 stopping viral replication and therefore preventing high transmission rates among hosts infected  
87 with transmissible variants like Omicron. India and China were the first countries to approve the  
88 vaccines BBV154 and Ad5-nCoV-S (respectively) for intranasal use [11]. By vaccinating  
89 intranasally from the beginning, or by introducing intranasal boosters on top of a completed  
90 intramuscular vaccine schedule, the primed immune response against SARS-CoV-2 exposures  
91 can evolve to include pathogen specific IgA antibodies as well as greater B cell and tissue-  
92 resident memory ( $T_{RM}$ ) responses throughout the respiratory tract [12–15].

93 Previously, our lab developed the experimental BReC-CoV-2 vaccine that was effective against  
94 SARS-CoV-2 challenge in K18-hACE2-transgenic mice when two doses were administered  
95 either first intramuscularly (prime) then intranasally (boost), or both intranasally [16]. To build

96 upon the protection of this formulation when administered intranasally, we aimed to improve the  
97 overall immunogenicity by utilizing a virus-like particle (VLP) antigen containing SARS-CoV-2  
98 WA-1 Receptor Binding Domain (RBD) proteins conjugated using the SpyTag system to a  
99 Hepatitis B surface antigen (HbsAg) [17]. The VLP-RBD particle increases the ratio of RBD  
100 antigen in the vaccine formulation compared to the RBD-CRM used in BReC-CoV-2. Similar to  
101 BReC-CoV-2, this VLP-based vaccine was then adjuvanted with the TLR4-agonist Bacterial  
102 Enzymatic Combinatorial Chemistry 470 (BECC 470) to enhance both the cellular and humoral  
103 immune responses [18,19]. Intranasal administration of two doses of the VLP-RBD-BECC  
104 vaccine to K18-hACE2 mice provided equal protection against disease manifestation and  
105 morbidity, as compared to two intramuscular administrations of an mRNA vaccine (mRNA-1273;  
106 1/10<sup>th</sup> human dose) after intranasal challenge with a lethal dose of the SARS-CoV-2 Delta  
107 variant. VLP-RBD-BECC limited viral replication in the upper airway at two days post-challenge  
108 and maintained a reduction in viral RNA in the nasal wash, lung, and brain, between days two  
109 and 10. VLP-RBD-BECC vaccinated mice showed similar serum IgG titers to mRNA vaccinated  
110 mice. Importantly, intranasal VLP-RBD-BECC elicited greater RBD specific IgA antibody levels  
111 in the lung and nasal cavity than mRNA vaccination or challenge alone. Compared to mRNA,  
112 VLP-RBD-BECC consistently maintained low histopathological inflammation scores and  
113 concentrations of proinflammatory CXCL10 in the lung tissue as well. VLP-RBD-BECC elicited  
114 reduced amounts of Omicron-specific antibodies, however, two doses of the vaccine still  
115 demonstrated some protection against viral replication in the lungs of mice following challenge  
116 with the Omicron variant.

## 117 **Methods**

### 118 ***Ethics and Biosafety Statement***

119 B6.Cg-Tg(K18-ACE2)2PrImn/J transgenic mice were purchased from Jackson Laboratories and  
120 used for vaccination and viral challenge studies under West Virginia University IACUC protocol

121 #2009036460. Mice were continuously monitored for adverse reactions to vaccination and for  
122 morbidity after challenge and were humanely euthanized according to our lab's disease scoring  
123 system. West Virginia University's Biosafety Level 3 Laboratory was used for SARS-CoV-2  
124 challenge studies under IBC protocol #20-09-03. Before additional analysis in BSL2 laboratory  
125 space, all mouse tissues obtained from BSL3 were treated with 1% Triton by volume or placed  
126 in TRIzol (Zymo R2050-1) to inactivate virus.

### 127 ***Formulation of VLP-RBD-BECC vaccine and K18-hACE2 mouse vaccination***

128 SARS-CoV-2 Wu RBD proteins were cloned into and purified from *Komgataella phaffi* as  
129 previously described [20–22]. To form the VLP, RBD-SpyTag antigens were incubated overnight  
130 with HBsAg-SpyCatcher VLP [23,24]. The BECC 470 adjuvant was obtained from Dr. Robert  
131 Ernst at the University of Maryland [18]. Vaccines were prepared in batch by sonicating 25µg  
132 BECC 470 per dose in water for 15min, then adding RBD-HBsAg VLP (10µg per dose) and  
133 incubated rotating at room temperature for 2hrs. Before administration, 10X PBS was added to  
134 bring the dose volume to 50µL. Female 7-week-old K18-hACE2 mice were intranasally  
135 vaccinated with 25µL per nare under anesthesia with intraperitoneal ketamine (Patterson  
136 Veterinary 07-803-6637)/xylazine (Patterson Veterinary 07-808-1947). No-vaccine no-challenge  
137 control mice were administered 50µL 1X PBS intramuscular in the hind flank. mRNA control  
138 mice were administered 50µL mRNA-1273 vaccine intramuscular in the hind flank as well. All  
139 vaccine groups received a second identical dose 4 weeks later.

### 140 ***Quantification of anti-SARS-CoV-2 RBD IgG antibodies by ELISA***

141 Submandibular bleeds to collect serum were performed to assess immunogenicity 4 weeks after  
142 prime and boost doses. Serum was also collected at euthanasia via cardiac puncture. Anti-  
143 SARS-CoV-2 RBD IgG levels were quantified using ELISA and a method described previously  
144 [25]. High binding plates were coated overnight with 2 µg/mL RBD. The next day, plates were

145 washed 3x and blocked with 3% nonfat milk in PBS-Tween20. After an hour incubation at room  
146 temperature, plates were washed 3x then prepared for sample: 5  $\mu$ L of serum in 95  $\mu$ L 1%  
147 nonfat milk-PBS-Tween20 was added to the top row, and 50  $\mu$ L of 1% nonfat milk-PBS-  
148 Tween20 was added to the remaining wells for dilution across two plates. Samples were diluted  
149 1:2 from row A of plate 1 to row G of plate 2, discarding before dilution into row H. Samples  
150 incubated shaking at room temperature for 1 hr. Plates were washed 4x before adding 100  $\mu$ L  
151 secondary antibody (goat anti-mouse IgG HRP; Novus Biologicals NB7539) (diluted 1:2000) in  
152 1% nonfat milk-PBS-Tween20 to all wells and shaking for an additional 1 hr at room  
153 temperature. Non-bound antibodies were washed with 5x washes and 100  $\mu$ L TMB substrate  
154 was added to all wells. After 15 min incubation in the dark, 25  $\mu$ L 2N sulfuric acid was added to  
155 stop development and plate absorbances were read at 450 nm on the Synergy H1 plate reader.  
156 Serum antibody levels were quantified using Area Under the Curve analysis in GraphPad Prism  
157 V9.0.0.

#### 158 ***Quantification of anti-SARS-CoV-2 RBD IgG antibodies by ELISA***

159 To measure anti-RBD IgA in K18-hACE2 mouse tissues following challenge, the ELISA protocol  
160 described previously was utilized with minor adaptations. High-binding 96-well plates were  
161 coated with RBD, washed and blocked following the same protocol as was used to measure  
162 IgG. Mouse samples were added to the top row of wells (5  $\mu$ L of serum in 95  $\mu$ L 1% nonfat milk-  
163 PBS-Tween20; 20  $\mu$ L lung supernatant in 80  $\mu$ L 1% nonfat milk-PBS-Tween20; 100  $\mu$ L nasal  
164 wash), then diluted down the columns 1:2 discarding before the last well. After 2 hours of  
165 incubation shaking at room temperature, 100  $\mu$ L anti-IgA secondary antibody diluted 1:10000  
166 (goat anti-mouse IgA HRP; Novus Biologicals NB7504) was added to all wells. Secondary  
167 antibody was left to incubate for 2 hours, then plates were washed, developed, and read as  
168 previously described.

#### 169 ***In vitro SARS-CoV-2 RBD ACE2 binding assay***

170 Neutralizing potential of serum antibodies collected from vaccinated K18-hACE2 mice pre- and  
171 post-challenge was analyzed using MSD's V-PLEX SARS-CoV-2 Panel 22 Mouse IgG kit  
172 (K15563U-2). Binding to the following antigens was assessed: COV-2 RBD, Delta RBD,  
173 Gamma RBD, Beta RBD, Alpha RBD, and Omicron RBD. Serum from mice euthanized at 10  
174 days post- challenge or from 4-week post-boost submandibular bleeds was diluted at 1:5, 1:50,  
175 1:500, and 1:5000 and analyzed following the manufacturer's protocol. Binding (%  
176 neutralization) was measured via electrochemiluminescence values compared to baseline wells  
177 with no antibody binding. The percent neutralization 50 (PRNT50) was calculated by fitting a  
178 nonlinear regression curve to the plotted percent binding values and interpolating unknowns in  
179 GraphPad Prism version 9.

#### 180 ***In vitro authentic SARS-CoV-2 plaque reduction assay***

181 Vero E6 ACE2/TMPRSS2 cells were plated at 70,000 cells per well in 24-well plates and  
182 incubated at 37°C and 5% CO<sub>2</sub> for 24 hours. Stock SARS-CoV-2 Delta virus (B.1.617.2 hCoV-  
183 19/USA/WV- WVU-WV118685/2021) was diluted in supplemented DMEM media. Mouse serum  
184 was diluted 1:5 then ten-fold serial dilutions in media. Diluted mouse serum was mixed with  
185 diluted virus in a 1:1 (v/v) ratio and incubated at room temperature for 30 minutes. Cell media  
186 was aspirated. 100µl of sample (serum + virus) was added to each well. Plates were incubated  
187 at 37°C and 5% CO<sub>2</sub> for 1 hour. Plates were gently rocked by hand every 15 minutes. After  
188 incubation, 1 mL of 0.6% carboxymethylcellulose overlay was added to each well. Plates were  
189 incubated at 37°C and 5% CO<sub>2</sub> for 4 days. On day 4, the overlay was aspirated. Wells were  
190 fixed with 10% neutral-buffered formalin and stained with 0.1% crystal violet before plaques  
191 were counted. Cell culture and plaque assay reagent recipes were adapted from Case, et al  
192 [26].

#### 193 ***SARS-CoV-2 challenge of K18-hACE2 mice***



194 Stocks of the SARS-CoV-2 Delta variant B.1.617.2 hCoV-19/USA/WV- WVU-WV118685/2021  
195 (GISAID Accession ID: EPI\_ISL\_1742834) were created from a patient sample at WVU that was  
196 propagated in Vero E6 cells (ATCC-CRL-1586) [27]. The stocks were sequenced to confirm  
197 there were no mutations. Omicron variant (strain BA.5) stocks were obtained from the labs of  
198 Dr. Luis Martinez-Sobrido and Dr. Jordi Torrelles at the Texas Biomedical Research Institute. At  
199 the time of challenge, vaccinated and control K18-hACE2 mice were anesthetized with an IP  
200 injection of ketamine/xylazine, then 25  $\mu$ L of a  $10^4$  PFU solution of Delta or  $10^5$  PFU solution of  
201 Omicron virus was administered by pipette into each nare (50  $\mu$ L total dose).

### 202 ***Disease scoring of SARS-CoV-2 challenged mice***

203 K18-hACE2 mice were evaluated every day after challenge to track disease progression  
204 through in-person health checks and using the SwifTAG video monitoring system. Rectal  
205 temperatures and weight measurements were recorded each day in addition to scores related to  
206 weight loss, changes in activity, appearance, eye closure/conjunctivitis, and respiration. Scores  
207 were awarded based on severity of disease phenotypes and follow a scale that has been  
208 described previously [17,25,27,28]. On each day, scores in each category were combined and  
209 recorded as one overall numerical score. Mice that received a total score of 5 or reached 20%  
210 weight loss before day 10 post-challenge were humanely euthanized.

### 211 ***Mouse euthanasia and tissue collection***

212 At day 2, 10, or due to meeting humane endpoint criteria, K18-hACE2 mice were euthanized  
213 with IP pentobarbital (390mg/kg) (Patterson Veterinary 07-805-9296) followed by cardiac  
214 puncture. Blood from cardiac puncture was centrifuged to collect the serum for downstream  
215 analysis. Lung and brain tissue were dissected out for downstream histology, serology, and  
216 quantification of viral burden. Homogenization of lung and brain was performed following a  
217 previously established protocol [17,25]. A nasal wash was performed on each mouse by

218 pushing PBS (1mL) by catheter through the nasal pharynx and collected for analysis. For RNA  
219 purification in BSL2, lung and brain homogenate as well as nasal wash was treated with TRIzol  
220 Reagent.

#### 221 ***SARS-CoV-2 plaque assay from tissue homogenate***

222 Vero E6 ACE2/TMPRSS2 cells were plated at 150,000 cells per well in 12-well plates and  
223 incubated at 37°C and 5% CO<sub>2</sub> for 24 hours. Mouse lungs collected at euthanasia were  
224 weighed then homogenized in 1mL PBS. Then, homogenate was centrifuged at 15,000 x g for 5  
225 minutes. Supernatant from mouse lung homogenate was diluted in media 1:3, 1:10, then four  
226 ten-fold serial dilutions. Cell media was aspirated. 200µl of sample was added to each well, in  
227 duplicate. Plates were incubated at 37°C and 5% CO<sub>2</sub> for 1 hour. Plates were gently rocked by  
228 hand every 15 minutes. After incubation, 2 mL of 0.6% carboxymethylcellulose overlay was  
229 added to each well. Plates were incubated at 37°C and 5% CO<sub>2</sub> for 4 days. On day 4, the  
230 overlay was aspirated. Wells were fixed with 10% neutral-buffered formalin and stained with  
231 0.1% crystal violet.

#### 232 ***qRT-PCR quantification of SARS-CoV-2 viral copy number in mouse tissues***

233 RNA from nasal wash, lung, and brain homogenates of virus-challenged mice was purified using  
234 the the Direct-zol RNA miniprep kit (Zymo Research R2053) according to the manufacturer's  
235 protocol. qPCR of the SARS-CoV-2 nucleocapsid gene was then performed for each mouse  
236 and sample using the Applied Biosystems TaqMan RNA to CT One Step Kit (ThermoFisher  
237 Scientific 4392938) to measure viral copy number via transcript number with specifications for  
238 each reaction that have been described previously [17,25,27,28].

#### 239 ***Measurement of CXCL10 concentrations in mouse serum and lung***

240 Concentrations of CXCL10 in K18-hACE2 mice were measured in serum and lung supernatant  
241 collected at euthanasia using the Mouse Magnetic Luminex Assay kit for mouse CXCL10/IP-

242 10/CRG2 (R&D Systems LXSAMSM-01). Both serum and supernatant samples were diluted 1:2  
243 in the kit's Calibrator Diluent RD6-52 then utilized in the assay procedure provided by the  
244 manufacturer. The assay plate was read on the Luminex MAGPIX instrument and chemokine  
245 levels were quantified based on a standard curve.

### 246 ***Histopathological evaluation of lung tissue inflammation***

247 The left lobes of mouse lungs were collected at euthanasia and stored in 10% neutral buffered  
248 formalin for one week to fix. Fixed tissues were sectioned and mounted on slides, then  
249 Hematoxylin and Eosin stained for analysis. Primary histopathological scoring was performed by  
250 iHisto under the supervision of chief pathologist Michelle X. Yang, MD, PhD. H&E-stained slides  
251 were evaluated for acute and chronic inflammation. Acute inflammation was marked by the  
252 infiltration of neutrophils in the parenchyma, blood vessels, and airways. Chronic inflammation  
253 was marked by mononuclear infiltrates in the same areas of the tissue. Semiquantitative scores  
254 for each condition (0- none, 1- minimal, 2- mild, 3- moderate, 4- marked, 5- severe) were  
255 awarded for tissue from each mouse. Additional analysis was performed by West Virginia  
256 University's Department of Pathology to identify more finite characteristics of inflammatory  
257 pathology. Margination of inflammatory cells in blood vessels was evaluated and graded as  
258 none, mild, moderate or severe. Viral cytopathic changes in the epithelial and interstitium were  
259 also evaluated and graded as absent, mild, moderate or severe. Other parameters that were  
260 evaluated included type of inflammatory cells, distribution of the inflammatory aggregates,  
261 presence of pneumonic infiltrates, bronchiolitis and vasculitis.

### 262 ***Statistical analyses***

263 The statistical analysis of data sets in this study was performed using GraphPad Prism version  
264 9. Mouse experiments were performed with an n=10 for all groups, with n=3 mice per group  
265 euthanized on day 2 and n=7 mice euthanized at day 10 post-challenge. Normally distributed

266 data sets were compared using ordinary one-way ANOVA with Tukey's multiple comparisons  
267 tests. Kaplan-Meier survival curves were created to compare the survival of vaccinated K18-  
268 hACE2 mice following viral challenge. Unpaired t-tests were utilized to compare two data sets.

## 269 **Results**

### 270 **VLP-RBD adjuvanted with BECC 470 (TLR4 agonist) induces IgG and IgA antibody** 271 **production when administered via the nasal route**

272 SARS-CoV-2 infection induces mucosal immune responses including production of IgA  
273 antibodies. To assess mucosal responses as well as systemic antibodies elicited by our novel  
274 VLP-RBD-BECC vaccine, K18-hACE2 transgenic mice were primed via the intranasal (IN) route  
275 using 10 µg VLP-RBD formulated with 25 µg BECC 470 (Fig. 1A). A control group of mice were  
276 vaccinated via the intramuscular (IM) route with 1/10<sup>th</sup> of a human dose (10 µg) of mRNA-1273--  
277 a highly protective Spike protein-based COVID-19 vaccine that has been used to vaccinate a  
278 large portion of the United States population. After four weeks, mice were administered a  
279 second identical boost dose of either vaccine to mimic the human COVID-19 vaccine schedule.  
280 We measured levels of IgG specific to the SARS-CoV-2 Spike protein receptor binding domain  
281 (RBD) at four weeks post-prime (Fig.1B), four weeks post-boost (Fig. 1C), and after challenge  
282 with the SARS-CoV-2 Delta strain (Fig. 1D). IM mRNA-1273 vaccinated mice showed high IgG  
283 levels post-prime whereas IN VLP-RBD-BECC mice showed relatively low early antibody  
284 responses. However, at post-boost the antibody levels in IN mice rose to levels near IM mRNA,  
285 albeit still significantly lower (Fig. 1C). At 10 days post-challenge with Delta, RBD specific IgG  
286 levels from IN VLP-RBD-BECC or mRNA remained similar to post-boost (no significance) (Fig.  
287 1D). mRNA vaccines are known to induce low levels of IgA in serum [29,30]; however, it is not  
288 clear if mRNA induces mucosal antibodies in mice. At 10 days post-challenge, low RBD-specific  
289 IgA levels were indeed detectable in the serum of IM mRNA vaccinated mice (Fig. 1E).  
290 vaccination with IN VLP-RBD-BECC, however, induced anti-RBD IgA antibodies at a much

291 greater level in serum (Fig.1E), nasal wash (Fig. 1F) and lung supernatants (Fig. 1G) post-  
292 challenge. These data confirm that intranasal vaccination with VLP-RBD-BECC can induce  
293 RBD-specific IgG antibodies in addition to highly desirable IgA antibodies.

294 **IN VLP-RBD-BECC vaccinated K18-hACE2 mice produce broadly neutralizing antibodies**  
295 **against SARS-CoV-2 variants**

296 One tenet of highly effective antibody responses is pathogen neutralization which blocks host  
297 cell receptor binding for viral entry. Antibodies raised in response to natural infection or  
298 vaccination bind the SARS-CoV-2 spike protein to block host cell ACE2 receptor binding and  
299 thus inhibit downstream viral replication and the progression of infection. To assess whether or  
300 not anti-RBD IgG antibodies from IN VLP-RBD-BECC could execute this inhibition, we  
301 performed an *in vitro* ACE2-RBD binding inhibition assay using the serum from vaccinated K18-  
302 hACE2 at euthanasia post-challenge. Serum IgG antibodies from IM mRNA vaccinated mice  
303 bound RBD from the ancestral, Alpha, Beta, and Delta SARS-CoV-2 variants of concern (VOC)  
304 and inhibited ACE2 binding at a greater capacity than serum from IN VLP-RBD-BECC mice *in*  
305 *vitro* (Fig. 2A). VLP-RBD-BECC antibodies at a 1:500 dilution still inhibited greater than 50%  
306 ACE2 binding to all VOC (Fig. 2A). At the greatest dilution, 1:5000, serum from both vaccinated  
307 groups dropped below 50% binding inhibition. It should be noted that mRNA immunized mice  
308 have the highest concentration of RBD-binding antibodies in serum post-vaccination and  
309 challenge (Fig. 1). IgG antibodies from VLP-RBD-BECC showed a calculated percent binding  
310 PRNT50 of 2341 against Delta RBD which was not dramatically reduced compared to the  
311 PRNT50 of mRNA-elicited antibodies at 3741 (Fig.2B). Authentic virus neutralization was further  
312 evaluated in a viral plaque reduction assay where the SARS-CoV-2 Delta variant was  
313 propagated *in vitro* with decreasing concentrations of serum from vaccinated mice collected  
314 post-boost. At a low dilution (1:10), mRNA vaccinated mouse serum fully prevented plaque  
315 formation (100% reduction) and at higher dilutions (1:100 and 1:1000) still reduced plaque

316 formation by 88% or more (Fig. 3). Serum from VLP-RBD-BECC vaccinated mice was also  
317 highly effective at neutralizing virus to prevent plaque formation when added to culture media at  
318 a 1:10 dilution and reduced more than 88% or 78% of plaques at higher dilutions (1:100 and  
319 1:1000 respectively). These assays show that although IgG antibodies elicited by our VLP-RBD-  
320 BECC vaccine have reduced inhibitory activity compared to those from mRNA, total antibodies  
321 (which may include IgM, IgA and other antibody subclasses) from these mice are still highly  
322 effective at limiting SARS-CoV-2 viral replication and plaque formation *in vitro*.

### 323 **IN VLP-RBD-BECC protects mice against challenge with SARS-CoV-2 Delta variant**

324 Each major SARS-CoV-2 VOC to emerge after the ancestral Wuhan strain, has presented  
325 pathological differences in the K18-hACE2 challenge model [27,31–33]. In particular, we have  
326 observed that the Delta variant requires a slightly higher dose to cause 100% mortality, but also  
327 that the tissue inflammation signatures and immunological response in mice are significantly  
328 different than other variants [27]. We challenged the IN VLP-RBD-BECC and IM mRNA-1273  
329 vaccinated K18-hACE2 mice to evaluate protection conferred against the Delta variant. Four  
330 weeks after boosting, mice were intranasally challenged them with a lethal dose ( $10^4$  PFU) of  
331 the SARS-COV-2 Delta variant to measure protection (Fig. 1A). Intranasal and intramuscular  
332 vaccines were equally matched in their disease-limiting abilities (Fig. 4). Compared to PBS-  
333 vaccinated and challenged mice, IM mRNA and IN VLP-RBD-BECC vaccinated mice  
334 maintained low disease scores over the course of the 10-day challenge window (Fig. 4A). IN  
335 VLP-RBD-BECC mice did not experience dramatic weight loss or drops in temperature, similar  
336 to the IM mRNA group (Fig. 4BC). VLP-RBD-BECC also conferred 100% survival compared to  
337 non-vaccinated mice which reached total morbidity and required humane euthanasia by day 6  
338 post-challenge (Fig. 4D). This data together suggests that VLP-RBD-BECC administered by two  
339 intranasal doses is as effective as mRNA-1273 at conferring protection against morbidity and  
340 mortality in SARS-CoV-2 related disease in K18-hACE2-mice.

341 **SARS-CoV-2 viral replication is limited by intranasal VLP-RBD-BECC**

342 In our challenge study, VLP-RBD-BECC and mRNA vaccinated K18-hACE2 mice were  
343 euthanized at day 2 and day 10 post-Delta challenge to assess the vaccines' ability to limit viral  
344 replication. Authentic plaque assays using lung supernatant from the mice euthanized at day 2  
345 showed that IN VLP-RBD-BECC vaccination and IM mRNA significantly limited viral replication  
346 in the lung compared to the PBS-vaccination control (Fig. 5A). Additional qRT-PCR analyses of  
347 the mice's nasal wash, lung and brain tissues further supported this finding. SARS-CoV-2 viral  
348 nucleocapsid RNA copies were significantly lower in the nasal wash of VLP-RBD-BECC mice  
349 compared to PBS vaccinated mice at day 2 and was further reduced at day 10 (Fig. 5B). In the  
350 lung, viral RNA burden was significantly lower in mRNA vaccinated mice than the PBS group,  
351 however there was no significant reduction in the viral RNA burden of VLP-RBD-BECC lungs at  
352 day 2 (Fig. 5C). At day 10, viral RNA burden in the lungs in both vaccine groups had reduced  
353 significantly from the level of controls, although it remained slightly above the limit of detection  
354 (Fig. 5C). Both vaccines prevented dissemination to and detection of viral RNA in the brain at 10  
355 days post-challenge when it was detectable in the brain tissue of control mice (Fig. 5D).

356 **Intranasal vaccination limits the production of CXCL10 following SARS-CoV-2 challenge**  
357 **in K18-hACE2 mice**

358 CXCL10 is a potent mediator of inflammation and immune cell homing to the tissues during  
359 SARS-CoV-2 infection [34]. It's production in the lung is linked to the cytokine storm  
360 experienced by hospitalized patients with severe cases of COVID-19 [35]. Previously, we  
361 identified that K18-hACE2 mice have high concentrations of CXCL10 in the lung 6 days post  
362 delta variant challenge [27]. To assess if vaccination strategies to protect individuals against  
363 severe COVID-19, including VLP-RBD-BECC, confer protection in part by limiting the production  
364 of the chemokine, we quantified CXCL10 levels in the serum and lung supernatant of  
365 vaccinated mice after Delta SARS-CoV-2 challenge. In the serum, CXCL10 production

366 increased at day 2 after viral challenge in PBS vaccinated control mice (Fig.6A). By day 10, this  
367 concentration had reduced slightly but at both timepoints, the concentration of the chemokine in  
368 IM mRNA or IN VLP-RBD-BECC remained low. CXCL10 production also peaked in the lung  
369 tissue of PBS vaccinated mice at day 2, to much higher concentrations than were detected in  
370 the serum (Fig.6B). In vaccinated mice, CXCL10 concentrations in the lung were also limited  
371 with no significant change between timepoints. The lack of CXCL10 production seen in the  
372 serum and lungs of vaccinated mice when compared to controls, demonstrate that vaccination  
373 effectively limits the production of proinflammatory chemokines produced in response to viral  
374 challenge.

375 **Intranasal VLP-RBD-BECC vaccination ameliorates lung inflammation in K18-hACE2**  
376 **mice after Delta challenge**

377 As a final aspect of vaccine evaluation, lung inflammation was measured by histopathological  
378 scoring of acute and chronic inflammation phenotypes. No significant inflammation was seen in  
379 the lungs of mice in the control group which served as a comparison to vaccine groups (Fig.  
380 67A). Delta challenge in PBS-vaccinated mice lead to viral cytopathic and reactive-proliferative  
381 changes in the epithelia of the terminal bronchioles, alveoli, and interstitial cells. Marked  
382 margination of inflammatory cells in blood vessels was observed and associated with a diffuse  
383 lymphocyte and histiocyte rich inflammatory infiltrate that involved 50-75% of the pulmonary  
384 parenchyma. At 2 days post-challenge, intramuscularly vaccinated mice showed higher acute  
385 inflammation scores than the intranasal group, suggesting that our intranasal vaccine better  
386 protects mice from early development of lung infection than IM mRNA, perhaps due to the route  
387 of administration and localized immune responses (Fig.7B). Interestingly, PBS vaccinated mice  
388 showed much lower lung inflammation at this time point than IM mRNA mice (there was no  
389 significant difference between PBS and IN VLP-RBD-BECC), suggesting perhaps a delayed  
390 inflammatory response to virus in the tissue. IM mRNA vaccinated mice euthanized 10 days



391 post-challenge were given low scores for acute inflammation which were not statistically  
392 different from IN VLP-RBD-BECC mice (Fig.7C). The diminished extent of pulmonary  
393 involvement was further supported by the observation of no significant margination of  
394 inflammatory cells or viral cytopathic changes in the vaccinated groups which decreased by day  
395 10 (Fig.7D). Overall, mice that were vaccinated either with IM mRNA or IN VLP-RBD-BECC  
396 showed marked attenuation of total inflammation compared to PBS vaccination, and involved  
397 less than 25% of the parenchyma. Inflammation in vaccinated mice consisted predominantly of  
398 tight, peribronchial and perivascular lymphocyte-rich aggregates (Fig.7EF). In total this  
399 histopathological analysis shows that IN VLP-RBD-BECC is able to control lung inflammation in  
400 the lungs of mice throughout the post-challenge window against SARS-CoV-2 related lung  
401 inflammation.

#### 402 **Mice are less protected by intranasal VLP-RBD-BECC against Omicron challenge**

403 The rise of the SARS-CoV-2 Omicron variant to clinical dominance resulted in a reduction of the  
404 protection that vaccines formulated against ancestral strains of the virus could provide. Using  
405 serum collected at euthanasia from IN VLP-RBD-BECC mice challenged with the Delta variant,  
406 we measured the capacity of IgG antibodies to bind Omicron RBD and thus prevent ACE2  
407 binding. VLP-RBD-BECC -elicited antibodies showed reduced RBD binding against the variant  
408 at dilutions of 1:5 and 1:50 compared to antibodies from mRNA-vaccinated mice (Fig.8A). To  
409 determine how this reduced neutralization activity correlated to a potential reduction in  
410 protection against the SARS-CoV-2 Omicron virus, we vaccinated a new cohort of mice with two  
411 doses of mRNA intramuscularly, or VLP-RBD-BECC intranasally. After prime, VLP-RBD-BECC  
412 mice again showed lower amounts of anti-Wuhan RBD IgG antibodies in serum, which  
413 increased post-boost (Fig.8B). The utility of matching vaccines to viral variant has been argued  
414 as a superior method of providing protection, resulting in the formulation of bivalent (multi-  
415 variant) mRNA vaccines for COVID-19 [36,37]. We repeated antibody quantification ELISAs

416 using RBD from the Omicron variant and observed a reduction in anti-RBD IgG antibodies in  
417 mRNA-vaccinated serum post-prime, and VLP-RBD-BECC serum at both time points (Fig.8C).  
418 Omicron does not cause morbidity in the K18-hACE2 transgenic mouse model, negating  
419 survival as a means of measuring protection in vaccine studies. To assess protection from VLP-  
420 RBD-BECC compared to mRNA, mice were euthanized at 2 and 6 days after intranasal  
421 challenge with  $10^5$  PFU Omicron to evaluate a reduction in viral replication. qRT-PCR analysis  
422 of the viral nucleocapsid gene showed no difference between control and vaccinated groups in  
423 the nasal wash or brain (data not shown). In the lung, viral RNA copy numbers were not  
424 significantly different between Omicron-challenged control mice and IN VLP-RBD-BECC groups  
425 at day 2 or day 6 (Fig.8D). However, viral replication, measured by plaque forming units in  
426 mouse lung tissue, was significantly lower at day 2 in VLP-RBD-BECC mice than in the lung  
427 tissue of controls (Fig.8E). By day 6, actively replicating virus was undetectable by plaque assay  
428 in any group. These data together demonstrate that although our VLP-RBD-BECC vaccine  
429 formulated using RBD from an ancestral virus elicits an antibody response that less-efficiently  
430 targets the Omicron variant, the vaccine still reduces the development of viral burden in the lung  
431 tissue of mice.

## 432 **Discussion**

433 As of the Fall of 2022, all COVID-19 vaccines approved for human use in the United States are  
434 administered via the intramuscular route. Across the globe, however, countries such as China  
435 and India have begun to approve a small number of intranasally-delivered platforms for use in  
436 the continued fight against COVID-19, and even more are being actively evaluated in preclinical  
437 and clinical trials [11]. Bharat Biotech's adenovirus vectored vaccine (formerly ChAd-SARS-  
438 CoV-2-S, now BBV154) after extensive preclinical characterization was approved in India for  
439 both primary vaccination and as a boost [38–40]. Another adenovirus vectored vaccine (Ad5-  
440 nCoV-S) by CanSino Biologics in China was approved for use as an inhalable booster after

441 initial approval for intramuscular use, highlighting the potential to explore alternative routes of  
442 administration with current vaccines to successfully incorporate intranasal vaccines into existing  
443 vaccine schedules [41,42]. While administration of mRNA intranasally would be an attractive  
444 approach to implementing an intranasal vaccine by repurposing an approved vaccine  
445 formulation, the lipid nanoparticle shells of these vaccines are not formulated for  
446 immunogenicity in the mucosa [12]. For intranasal use, vaccine platforms based on virus-like  
447 particles which are highly immunogenic and incapable of replication (unlike adenoviruses or  
448 lentiviruses making them safe for the elderly or immunocompromised), are a promising future  
449 technology [43]. SpyBiotech developed a VLP-based vaccine for COVID-19 that, when  
450 adjuvanted with alum or alum+CpG, conferred protection to rhesus macaque following SARS-  
451 CoV-2 challenge [23,44]. The preclinical efficacy of this vaccine quickly prompted its  
452 advancement to clinical trials, and here we have evaluated this antigen by intranasal route and  
453 in combination with the BECC adjuvant.

454 In our study, we evaluated the combinatorial use of SpyBiotech's VLP-RBD, and the BECC 470  
455 adjuvant, established by our lab to be an effective intranasal vaccine antigen in BReC-CoV-2,  
456 as an intranasal vaccine for COVID-19. K18-hACE2 mice vaccinated with two doses of  
457 intranasal VLP-RBD-BECC were protected against the development of severe disease and  
458 morbidity after challenge with a lethal dose of the SARS-CoV-2 Delta variant. We demonstrated  
459 that intranasal VLP-RBD-BECC elicits high anti-RBD IgG and IgA production, as compared to  
460 intramuscular mRNA. The neutralizing activity of serum antibodies was lower in IN mice than  
461 IM, but IN vaccination was still able to limit viral replication at 2 DPC. Viral RNA burden in the  
462 lungs and nasal wash was reduced by IN vaccination at 10 DPC as compared to in NVC mice.  
463 Importantly, IN vaccination prevented the dissemination of virus into the brain 10 DPC. Lung  
464 inflammation, conferred potentially by the reduced production of the chemokine CXCL10, was  
465 consistently limited after IN vaccination over the course of challenge studies (2 and 10 DPC).

466 Despite similarities in the viral RNA burden detectable in the lungs of IN and IM vaccinated mice  
467 and similar scores for inflammation at day 10 post-challenge, IN VLP-RBD-BECC mice  
468 displayed lower scores for lung inflammation at day 2 when compared to IM mRNA. Together  
469 our data demonstrates that VLP-RBD-BECC administered via the intranasal route can provide  
470 similar protection to mRNA-1273 against the Delta variant when administered intramuscularly.  
471 While both intramuscular mRNA and intranasal VLP-RBD-BECC were able to fully protect mice  
472 from challenge, future studies should evaluate the dose ranges and longevity of protection for  
473 each vaccine formulation and vaccination scheme.

474 The hepatitis B surface antigen-based VLP-RBD used in this vaccine study utilized RBD from  
475 an ancestral strain of SARS-CoV-2 (Wuhan/Washington-1). While currently approved COVID-19  
476 vaccines on the market have utilized ancestral sequences and proteins of RBD and Spike, the  
477 concept of matching vaccine antigen to challenge strain has recently gained more attention.  
478 Emerging variants of SARS-CoV-2 acquire additional mutations to the viral Spike protein which  
479 decreases the ability of neutralizing antibodies and other aspects of the immune system that  
480 recognize the ancestral protein to recognize new variants like Omicron. Moderna and Pfizer-  
481 BioNTech's bivalent mRNA booster vaccines were recently approved for use in the United  
482 States as a means of enhancing variant-specific immunity [36,37]. Both vaccines conserve  
483 inclusion of genetic material from the ancestral strain, but additionally contain genetic  
484 sequences encoding the Omicron BA.4 and BA.5 variants. It's been largely reported that original  
485 COVID-19 vaccines remained partially protective against severe disease against the Delta and  
486 Omicron variants albeit with increased waning of protection over time [45]. We showed  
487 previously that VLP-RBD with other adjuvants was protective intramuscularly against early  
488 SARS-CoV-2 variants of concern [17]. Intranasal VLP-RBD-BECC was 100% protective against  
489 lethal Delta challenge in the K18-hACE2 mouse, boasting the superiority of this vaccine as  
490 compared to our BreC-CoV2 vaccine [16]. One area where intranasal VLP-RBD-BECC did not

491 outperform intramuscular mRNA was in *in vitro* RBD-ACE2 neutralization. Although neutralizing  
492 antibodies from intranasal mice were high in serum post-boost and prevented Delta plaque  
493 formation, and our *in vitro* binding assay showed high ACE2-RBD binding inhibition against  
494 Delta when it was the challenge strain, vaccination-induced antibodies did not highly recognize  
495 Omicron RBD and did not convey sterilizing immunity against early Omicron virus replication in  
496 the lungs (at day 2). To meet our goal of developing a vaccination scheme that will improve  
497 protection against highly transmissible viral variants, future studies with this platform would need  
498 to assess the incorporation of VOC specific RBD into the VLP antigen before the vaccine moves  
499 into other preclinical models like hamsters where we can assess additional correlates of  
500 protection like reduced transmission.

501 Numerous intranasal vaccines utilizing a variety of platforms have been characterized in  
502 preclinical K18-hACE2 mouse challenge experiments [14,16,54–58,46–53]. Intranasal vaccines  
503 are also being developed by other labs to improve COVID-19 vaccines, although none reported  
504 so far have utilized the virus-like particle, and none have been evaluated preclinically against  
505 the highly virulent and pathogenic Delta variant. The adenovirus platform is another popular  
506 option for intranasal vaccines due to its high immunogenicity. One dose of ChAd-SARS-CoV-2-  
507 S, an adenovirus-based Spike protein-encoding vaccine that has progressed to evaluation in  
508 human trials, was shown to be protective in mice, hamsters, and rhesus macaques [39,40,57].  
509 Hassan, et al. reported that ChAd-SARS-CoV-2-S confers lasting immunity against SARS-CoV-  
510 2 variants of concern using serological assays against variant strain RBD. Although dampened  
511 compared to ancestral strains, ChAd-SARS-CoV-2-S induced neutralizing antibodies that bound  
512 Delta [57]. To our knowledge, this vaccine and its correlates of protection have yet to be  
513 evaluated authentically in a challenge study with the Delta variant. Vesin et al. evaluated the  
514 protection of a lentiviral based Spike vaccine (Lv:S) as a boost in Ad5:hACE2 transfected mice  
515 later challenged with the Delta variant [56]. Although this Delta challenge model did not utilize

516 the K18-hACE2 transgenic mouse that is susceptible to SARS-CoV-2 induced pathology, it did  
517 show effective limitation of viral RNA post-challenge in the lung [56]. In these studies,  
518 researchers assessed the added benefits of intranasal vaccination that exist in addition to  
519 protection against morbidity and mortality. Immunogenicity studies for intranasal vaccines have  
520 described that they are able to not only elicit high mucosal antibody levels, but important T cell  
521 populations resident to the lung and respiratory tract [59]. This priming of the mucosa is likely a  
522 major contributor to reducing early disease pathology—reduced viral replication in the upper  
523 respiratory tract, limited lung inflammation, and decreased transmission/viral shedding—seen by  
524 our lab and others. Vesin et al. evaluated the implementation of their IN Lv:S vaccine as a  
525 booster in addition to a previously administered mRNA schedule [56]. This is an important  
526 variable to consider as we work to implement intranasal vaccines into the long-term COVID-19  
527 response as most of the world will be intramuscularly vaccinated and require additional  
528 boosters. VLP-RBD-BECC could be an advantageous booster for COVID-19 protection due its  
529 mucosal IgA responses which would supplement the strong IgG-dominant responses incurred  
530 by mRNA priming. While VLP-RBD-BECC and mRNA were equally matched in their ability to  
531 confer protection against SARS-CoV-2 challenge, we showed that antibody responses to both  
532 vaccines were distinct. VLP-RBD-BECC as an intranasal vaccine primed the host for IgA  
533 production, which was not seen in mRNA vaccinated mice, but mRNA vaccinated mice showed  
534 higher IgG production systemically. IgA responses may provide better sterilizing immunity in the  
535 mucosa, protecting against disease pathology and possibly even transmission in a manner  
536 which systemic IgG levels cannot. The function of VLP-RBD-BECC induced IgA compared to  
537 mRNA-induced IgG merits further study. Additionally, the BECC 470 adjuvant used in this  
538 formulation was described to confer a Th1 dominant T cell response in BReC-CoV-2 which  
539 could diversify the immune response to mRNA which is normally dominated by B cells [60].  
540 Deeper cellular analyses using these vaccines could help shed light on their unique  
541 mechanisms of protection. To further enhance the translational ability of this work, a model of

542 waning immunity would also need to be established to mimic the changes in memory responses  
543 over time.

544 This VLP-RBD-BECC formulation shows promise as the COVID-19 pandemic progresses.  
545 Additional immunogenicity studies using Omicron RBD or other emerging strain RBDs will be  
546 necessary to improve the neutralizing antibody responses suggested by this challenge study. In  
547 these future immunogenicity studies, it will also be important to characterize the tissue-specific  
548 T cell responses to vaccination. Lung-resident T regulatory and T memory cells are vital to the  
549 lasting protection against SARS-CoV-2 [61–63]. Investigation of the neutralizing abilities of  
550 vaccine-induced IgA responses will also be interesting for describing not just the mechanistic  
551 ability of VLP-RBD-BECC to induce protection, but for also characterizing the potential of  
552 intranasal vaccines against other pathogens.

### 553 **Figure Legends**

554 **Figure 1: Intranasal VLP-RBD-BECC induces strong antibody responses in K18-hACE2**  
555 **mice.** Anti-RBD IgG levels were measured in serum A) four weeks post-prime vaccination, and  
556 B) four weeks post-boost vaccination (n=10 mice per group). Serum, nasal wash, and lung  
557 supernatant were collected at euthanasia points (NVC mice reached total morbidity by day 6  
558 while all other groups survived to day 10 post-challenge) to measure C) serum anti-RBD IgG, D)  
559 serum anti-RBD IgA, E) nasal wash anti-RBD IgA, and F) lung supernatant anti-RBD IgA (n=7  
560 mice euthanized at 6 or 10 DPC). Each point denotes one biological replicate. One Way  
561 ANOVA with Tukey's Multiple Comparisons was performed to determine *P* value: \*\*\*\**P*<0.0001,  
562 \*\*\**P*<0.0006, \*\**P*=0.0063

563 **Figure 2: Neutralizing antibodies against multiple SARS-CoV-2 VOC RBD are elicited**  
564 **from IN VLP-RBD-BECC.** A) Serum IgG antibodies from mRNA or VLP-RBD-BECC vaccinated  
565 mice were analyzed at euthanasia point 6 (NVC) or 10 (IM mRNA or IN VLP-RBD-BECC) days

566 post-challenge to measure *in vitro* ACE2-RBD % binding inhibition and compared to PBS-  
567 vaccinated and challenged mice. Points represent the average of n=6-7 biological replicates.  
568 Unpaired T tests were performed for statistical analysis: \* = significance between mRNA and  
569 VLP-RBD-BECC at dilution point ( $P<0.05$ ). B) The PRNT50 (percent neutralization 50) values  
570 were interpolated for each biological replicate from the dilution curve of % binding inhibition. way  
571 ANOVA with Tukey's Multiple Comparisons was performed for statistical analysis. \*\*\* $P<0.0091$ ,  
572 \*\* $P=0.0020$ .

573 **Figure 3: Serum from VLP-RBD-BECC vaccinated mice reduce plaque formation *in vitro*.**

574 Serum collected 4 weeks post-boost was added with Delta SARS-CoV-2 (n=10 biological  
575 samples per group) to Vero E6-AT cells to measure the ability of antibodies to reduce plaque  
576 formation. Unpaired t-tests were performed for statistical analysis: \*  $P<0.05$

577 **Figure 4: Vaccination with VLP-RBD-BECC intranasally confers protection against lethal**

578 **challenge with Delta.** A) Mice were monitored daily for disease progression after challenge  
579 with the sum of their disease scores reported daily for up to 10 days post-challenge. B) Daily  
580 weight and C) temperature change was measured to monitor disease. Mice in the NVC group  
581 reached morbidity by day 6 at which point disease scores stopped being reported. Any mice  
582 euthanized before complete euthanasia of the group had their score retained for reporting. D)  
583 Kaplan Meier survival curve of vaccinated and viral-challenged K18-hACE2 mice. (n=7 mice per  
584 group)

585 **Figure 5: IN VLP-RBD-BECC and IM mRNA limit viral replication and tissue viral burden.**

586 A) PFUs from lung homogenates of mice euthanized 2 days post-challenge (n=3 mice per  
587 group). B) qRT-PCR was performed to measure viral RNAs in the nasal wash, C) lung and D)  
588 brain of mice in each experimental group euthanized at day 2 post-challenge or at euthanasia.  
589 Mice in the NVC group all reached morbidity by day 6 (symbols outlined in red) while all other  
590 groups survived to day 10. Copy numbers calculated below the limit of detection (LOD



591 designated by dashed line) were set as equal to the LOD for reporting. One way ANOVA with  
592 Tukey's Multiple Comparisons was performed for statistical analysis. \*\*\*\* $P<0.0001$ ,  
593 \*\*\* $P=0.0003$ , \*\* $P=0.0066$ , \* $P=0.0445$ . (n=3 mice per group euthanized at 2 DPC, n=7 mice  
594 euthanized humane endpoint or 10 DPC)

595 **Figure 6: Vaccination limits CXCL10 production in the lung after Delta variant challenge.**

596 CXCL10 concentrations were quantified in the A) serum and B) lung supernatant of K18-hACE2  
597 mice 2 or 10 days after SARS-CoV-2 viral challenge (NVC mice surviving past 2 DPC were  
598 euthanized 4-6 DPC). Each symbol represents one biological replicate. One way ANOVA with  
599 Tukey's Multiple Comparisons was performed for statistical analysis. \*\*\*\* $P<0.0001$ , \*\*\* $P<0.0003$   
600 \*\* $P<0.0013$

601 **Figure 7: Histopathological analysis shows lung inflammation is limited by VLP-RBD-**

602 **BECC in SARS-CoV-2 challenged mice.** A) Representative images of H&E-stained mouse  
603 lungs collected at euthanasia after viral challenge. Total inflammation scores comprised of acute  
604 and chronic inflammation scores were awarded to mice euthanized B) two (n=3) or C) 10 days  
605 (n=7) post-challenge (NVC mice surviving past 2 DPC were euthanized on or before 6 DPC).  
606 For each parameter of acute and chronic inflammation, 0=none; 1=minimal; 2=mild;  
607 3=moderate; 4=marked; 5=severe. D) Margination of immune cells into the blood vessels was  
608 scored for each mouse where 0=none; 1=mild; 2=moderate; 3=severe. Statistical analyses were  
609 performed using one way ANOVA with Tukey's Multiple Comparisons: \*\*\*\* $P<0.0001$ , \* $P<0.0295$

610 **Figure 8: Protection from VLP-RBD-BECC is reduced against Omicron challenge.** A) *In*

611 *vitro* binding inhibition assays were performed to measure the binding of serum IgG antibodies  
612 collected two weeks post boost to Omicron RBD. Points denote the average of n=6 biological  
613 replicates, Unpaired T tests were performed for statistical analysis: \* = significance between  
614 mRNA and VLP-RBD-BECC at dilution point ( $P<0.05$ ). B) Anti-Wuhan RBD IgG antibodies and  
615 C) anti-Omicron RBD IgG antibodies were quantified by ELISA in serum two weeks post prime

616 and two weeks post boost. D) qRT-PCR analysis was performed to determine copy number of  
617 the SARS-CoV-2 nucleocapsid gene in lung tissue homogenates collected 2- or 6-days post-  
618 challenge. Dashed lines indicate the limit of detection. E) Plaque assays were performed using  
619 lung tissue supernatant collected 2- or 6-days post-challenge to measure viral burden. Each  
620 point denotes one biological replicate. One Way ANOVA with Tukey's Multiple Comparisons  
621 was performed to determine  $P$  value: \*\*\*\* $P < 0.0001$ , \*\*\* $P < 0.0006$ , \*\* $P = 0.0017$

## 622 **Acknowledgments**

623 We thank Drs. Laura Gibson and Clay Marsh of the West Virginia University Health Sciences  
624 Center for their support of COVID-19 preclinical research efforts. We would like to thank Drs.  
625 Matthew D.J. Dicks and Sumi Biswas (SpyBiotech) for the use of their VLP-RBD platform and  
626 Dr. Robert Ernst for the use of the BECC adjuvant. We thank Dr. Christopher Love (MIT) for  
627 providing the Spytagged RBD used in the VLP-RBD. We thank Dr. Ivan Martinez and Michael  
628 Winters for propagating the original challenge strain of the SARS-CoV-2 Delta variant, and Dr.  
629 Luis Martinez-Sobrido and Dr. Jordi Torrelles from the Texas Biomedical Research Institute for  
630 providing us with stocks of the Omicron variant for preclinical challenge studies. We would also  
631 like to acknowledge Mary Tomago-Chesney for her preparation of lung tissues for histology. We  
632 want to thank WVU's Electron Microscopy, Histopathology and Tissue Bank Core for the images  
633 of lung tissues. The preparation of figures for this manuscript was supported by GraphPad  
634 Prism and BioRender.

## 635 **Funding**

636 F.H.D. and the Vaccine Development Center (VDC) are supported by Research Challenge grant  
637 number HEPC.dsr.18.6 from the Division of Science and Research, West Virginia Higher  
638 Education Policy Commission. MSD QuickPlex SQ120 in the West Virginia University (WVU)  
639 Flow Cytometry & Single Cell Core Facility is supported by the Institutional Development

640 Awards (IDeA) from the National Institute of General Medical Sciences of the National Institutes  
641 of Health under grant numbers P30GM121322 (TME CoBRE) and P20GM103434 751 (INBRE).

## 642 **Author Contributions**

643 These studies were designed by FHD, KSL, TYW and JRB. The BECC470 adjuvant was  
644 developed and provided by RKE. Viral strains were propagated and sequenced by MTW and  
645 IM. Mouse challenge studies as well as the subsequent necropsy and tissue processing were  
646 performed by KSL, OAM and MC. ELISAs were performed by NAR, OAM, and KSL. MC  
647 performed plaque assays, plaque reduction assays, and *in vitro* antibody neutralization assays.  
648 qRT-PCR of tissue viral RNA was performed by OAM. Luminex assays were performed by KSL.  
649 Histopathological analyses of lung tissues were carried out by MSA. The data in this manuscript  
650 was prepared by KSL and FHD. All authors contributed to the writing and revision of this  
651 manuscript.

## 652 **References**

- 653 [1] Zuckerman JN. The importance of injecting vaccines into muscle□: Different patients  
654 need different needle sizes. *BMJ Br Med J* 2000;321:1237.  
655 <https://doi.org/10.1136/BMJ.321.7271.1237>.
- 656 [2] Pollard AJ, Bijker EM. A guide to vaccinology: from basic principles to new developments.  
657 *Nat Rev Immunol* 2020 212 2020;21:83–100. [https://doi.org/10.1038/s41577-020-00479-](https://doi.org/10.1038/s41577-020-00479-7)  
658 [7](https://doi.org/10.1038/s41577-020-00479-7).
- 659 [3] Rosenbaum P, Tchitchek N, Joly C, Rodriguez Pozo A, Stimmer L, Langlois S, et al.  
660 Vaccine Inoculation Route Modulates Early Immunity and Consequently Antigen-Specific  
661 Immune Response. *Front Immunol* 2021;12:1362.  
662 <https://doi.org/10.3389/FIMMU.2021.645210/BIBTEX>.

- 663 [4] Ols S, Yang L, Thompson EA, Pushparaj P, Tran K, Liang F, et al. Route of Vaccine  
664 Administration Alters Antigen Trafficking but Not Innate or Adaptive Immunity. *Cell Rep*  
665 2020;30:3964-3971.e7. <https://doi.org/10.1016/J.CELREP.2020.02.111>.
- 666 [5] Alu A, Chen L, Yuquan HL, Tian WX, Wei X. Intranasal COVID-19 vaccines: From bench  
667 to bed-NC-ND license (<http://creativecommons.org/licenses/by-nc-nd/4.0/>) 2022.  
668 <https://doi.org/10.1016/j>.
- 669 [6] Redfield RR, Kenzie WR Mac, Kent CK, Leahy MA, Martinroe JC, Spriggs SR, et al.  
670 Prevention and Control of Seasonal Influenza with Vaccines: Recommendations of the  
671 Advisory Committee on Immunization Practices-United States, 2018-19 Influenza Season  
672 Morbidity and Mortality Weekly Report Recommendations and Reports Centers for  
673 Disease Control and Prevention MMWR Editorial and Production Staff (Serials) MMWR  
674 Editorial Board CDC Adoption of ACIP Recommendations for MMWR Recommendations  
675 and Reports, MMWR Policy Notes, and Immunization Schedules (Child/Adolescent,  
676 Adult) 2018.
- 677 [7] Lavelle EC, Ward RW. Mucosal vaccines — fortifying the frontiers. *Nat Rev Immunol*  
678 2021 224 2021;22:236–50. <https://doi.org/10.1038/s41577-021-00583-2>.
- 679 [8] Waltz E. How nasal-spray vaccines could change the pandemic. *Nature* 2022;609:240–2.  
680 <https://doi.org/10.1038/D41586-022-02824-3>.
- 681 [9] Topol EJ, Iwasaki A. Operation Nasal Vaccine—Lightning speed to counter COVID-19.  
682 *Sci Immunol* 2022;7. [https://doi.org/10.1126/SCIIMMUNOL.ADD9947/ASSET/99E73652-  
683 A709-495C-92AA-1B8A0B05A7E5/ASSETS/IMAGES/LARGE/SCIIMMUNOL.ADD9947-  
684 FB.JPG](https://doi.org/10.1126/SCIIMMUNOL.ADD9947/ASSET/99E73652-A709-495C-92AA-1B8A0B05A7E5/ASSETS/IMAGES/LARGE/SCIIMMUNOL.ADD9947-FB.JPG).
- 685 [10] Evans JP, Zeng C, Carlin C, Lozanski G, Saif LJ, Oltz EM, et al. Neutralizing antibody  
686 responses elicited by SARS-CoV-2 mRNA vaccination wane over time and are boosted

- 687 by breakthrough infection. *Sci Transl Med* 2022;14:8057.
- 688 [https://doi.org/10.1126/SCITRANSLMED.ABN8057/SUPPL\\_FILE/SCITRANSLMED.ABN](https://doi.org/10.1126/SCITRANSLMED.ABN8057/SUPPL_FILE/SCITRANSLMED.ABN)
- 689 [8057\\_MDAR\\_REPRODUCIBILITY\\_CHECKLIST.ZIP](https://doi.org/10.1126/SCITRANSLMED.ABN8057/SUPPL_FILE/SCITRANSLMED.ABN8057_MDAR_REPRODUCIBILITY_CHECKLIST.ZIP).
- 690 [11] Waltz E. China and India approve nasal COVID vaccines — are they a game changer?
- 691 *Nature* 2022. <https://doi.org/10.1038/D41586-022-02851-0>.
- 692 [12] Mao T, Israelow B, Peña-Hernández MA, Suberi A, Zhou L, Luyten S, et al.
- 693 Unadjuvanted intranasal spike vaccine elicits protective mucosal immunity against
- 694 sarbecoviruses. *Science* (80- ) 2022. <https://doi.org/10.1126/SCIENCE.ABO2523>.
- 695 [13] Christensen D, Polacek C, Sheward DJ, Hanke L, Moliner-Morro A, McInerney G, et al.
- 696 Protection against SARS-CoV-2 transmission by a parenteral prime—Intranasal boost
- 697 vaccine strategy. *EBioMedicine* 2022;84:104248.
- 698 <https://doi.org/10.1016/j.ebiom.2022.104248>.
- 699 [14] Zhou R, Wang P, Wong YC, Xu H, Lau SY, Liu L, et al. Nasal prevention of SARS-CoV-2
- 700 infection by intranasal influenza-based boost vaccination in mouse models. *EBioMedicine*
- 701 2022;75:103762. <https://doi.org/10.1016/j.ebiom.2021.103762>.
- 702 [15] Zhao J, Zhao J, Mangalam AK, Channappanavar R, Fett C, Meyerholz DK, et al. Airway
- 703 Memory CD4+ T Cells Mediate Protective Immunity against Emerging Respiratory
- 704 Coronaviruses. *Immunity* 2016;44:1379–91.
- 705 <https://doi.org/10.1016/J.IMMUNI.2016.05.006>.
- 706 [16] Wong TY, Lee KS, Russ BP, Horspool AM, Kang J, Winters MT, et al. Intranasal
- 707 administration of BReC-CoV-2 COVID-19 vaccine protects K18-hACE2 mice against
- 708 lethal SARS-CoV-2 challenge. *NPJ Vaccines* 2022;7. [https://doi.org/10.1038/S41541-](https://doi.org/10.1038/S41541-022-00451-7)
- 709 [022-00451-7](https://doi.org/10.1038/S41541-022-00451-7).

- 710 [17] Wong TY, Russ BP, Lee KS, Miller OA, Kang J, Cooper M, et al. RBD-VLP Vaccines  
711 Adjuvanted with Alum or SWE Protect K18-hACE2 Mice against SARS-CoV-2 VOC  
712 Challenge. *MSphere* 2022;7. <https://doi.org/10.1128/MSPHERE.00243-22>.
- 713 [18] Gregg KA, Harberts E, Gardner FM, Pelletier MR, Cayatte C, Yu L, et al. Rationally  
714 designed TLR4 ligands for vaccine adjuvant discovery. *MBio* 2017;8.  
715 <https://doi.org/10.1128/mBio.00492-17>.
- 716 [19] Gregg KA, Harberts E, Gardner FM, Pelletier MR, Cayatte C, Yu L, et al. A lipid A-based  
717 TLR4 mimetic effectively adjuvants a *Yersinia pestis* rF-V1 subunit vaccine in a murine  
718 challenge model. *Vaccine* 2018;36:4023.  
719 <https://doi.org/10.1016/J.VACCINE.2018.05.101>.
- 720 [20] Hotez PJ, Bottazzi ME. Developing a low-cost and accessible COVID-19 vaccine for  
721 global health. *PLoS Negl Trop Dis* 2020;14:e0008548.  
722 <https://doi.org/10.1371/JOURNAL.PNTD.0008548>.
- 723 [21] Love KR, Dalvie NC, Love JC. The yeast stands alone: the future of protein biologic  
724 production. *Curr Opin Biotechnol* 2018;53:50–8.  
725 <https://doi.org/10.1016/j.copbio.2017.12.010>.
- 726 [22] Dalvie NC, Biedermann AM, Rodriguez-Aponte SA, Naranjo CA, Rao HD, Rajurkar MP,  
727 et al. Scalable, methanol-free manufacturing of the SARS-CoV-2 receptor-binding domain  
728 in engineered *Komagataella phaffii*. *Biotechnol Bioeng* 2022;119:657–62.  
729 <https://doi.org/10.1002/BIT.27979>.
- 730 [23] Dalvie NC, Tostanoski LH, Rodriguez-Aponte SA, Kaur K, Bajoria S, Kumru OS, et al.  
731 SARS-CoV-2 receptor binding domain displayed on HBsAg virus-like particles elicits  
732 protective immunity in macaques. *Sci Adv* 2022;8:6015.  
733 <https://doi.org/10.1126/SCIADV.ABL6015>.

- 734 [24] Singh SK, Thrane S, Janitzek CM, Nielsen MA, Theander TG, Theisen M, et al.  
735 Improving the malaria transmission-blocking activity of a Plasmodium falciparum 48/45  
736 based vaccine antigen by SpyTag/SpyCatcher mediated virus-like display. *Vaccine*  
737 2017;35:3726–32. <https://doi.org/10.1016/J.VACCINE.2017.05.054>.
- 738 [25] Wong TYT, Lee KSK, Russ B, Horspool AMA, Kang JK, Winters M, et al. Intranasal  
739 administration of BReC-CoV-2 COVID-19 vaccine protects K18-hACE2 mice against  
740 lethal SARS-CoV-2 challenge [Accepted Jan. 20, 2022 PMID: PMC Journal - In  
741 Process]. *Npj Vaccines* 2022.
- 742 [26] Case JB, Bailey AL, Kim AS, Chen RE, Diamond MS. Growth, detection, quantification,  
743 and inactivation of SARS-CoV-2. *Virology* 2020;548:39–48.  
744 <https://doi.org/10.1016/j.virol.2020.05.015>.
- 745 [27] Lee KS, Wong TY, Russ BP, Horspool AM, Miller OA, Rader NA, et al. SARS-CoV-2  
746 Delta variant induces enhanced pathology and inflammatory responses in K18-hACE2  
747 mice. *PLoS One* 2022;17:e0273430. <https://doi.org/10.1371/JOURNAL.PONE.0273430>.
- 748 [28] Lee KS, Russ BP, Wong TY, Horspool AM, Winters MT, Barbier M, et al. Obesity and  
749 metabolic dysfunction drive sex-associated differential disease profiles in hACE2-mice  
750 challenged with SARS-CoV-2. *IScience* 2022;25:105038.  
751 <https://doi.org/10.1016/J.ISCI.2022.105038>.
- 752 [29] Corbett KS, Nason MC, Flach B, Gagne M, O'Connell S, Johnston TS, et al. Immune  
753 correlates of protection by mRNA-1273 vaccine against SARS-CoV-2 in nonhuman  
754 primates. *Science (80- )* 2021;373.  
755 [https://doi.org/10.1126/SCIENCE.ABJ0299/SUPPL\\_FILE/SCIENCE.ABJ0299\\_Mدار\\_R](https://doi.org/10.1126/SCIENCE.ABJ0299/SUPPL_FILE/SCIENCE.ABJ0299_Mدار_R)  
756 [EPRODUCIBILITY\\_CHECKLIST.PDF](https://doi.org/10.1126/SCIENCE.ABJ0299/SUPPL_FILE/SCIENCE.ABJ0299_Mدار_R).
- 757 [30] Wisnewski A V., Luna JC, Redlich CA. Human IgG and IgA responses to COVID-19

- 758 mRNA vaccines. *PLoS One* 2021;16:e0249499.  
759 <https://doi.org/10.1371/JOURNAL.PONE.0249499>.
- 760 [31] Wong TY, Horspool AM, Russ BP, Ye C, Lee KS, Winters MT, et al. Evaluating antibody  
761 mediated protection against Alpha, Beta, and Delta SARS-CoV-2 variants of concern in  
762 K18-hACE2 transgenic mice 2022;96:2184–205. <https://doi.org/10.1128/JVI.02184-21>.
- 763 [32] Diamond M, Halfmann P, Maemura T, Iwatsuki-Horimoto K, Iida S, Kiso M, et al. The  
764 SARS-CoV-2 B.1.1.529 Omicron virus causes attenuated infection and disease in mice  
765 and hamsters. *Res Sq* 2021. <https://doi.org/10.21203/rs.3.rs-1211792/v1>.
- 766 [33] Liu X, Mostafavi H, Ng WH, Freitas JR, King NJC, Zaid A, et al. The Delta SARS-CoV-2  
767 Variant of Concern Induces Distinct Pathogenic Patterns of Respiratory Disease in K18-  
768 hACE2 Transgenic Mice Compared to the Ancestral Strain from Wuhan. *MBio* 2022.  
769 <https://doi.org/10.1128/MBIO.00683-22>.
- 770 [34] Gudowska-Sawczuk M, Mroczko B. What Is Currently Known about the Role of CXCL10  
771 in SARS-CoV-2 Infection? *Int J Mol Sci* 2022;23. <https://doi.org/10.3390/IJMS23073673>.
- 772 [35] Lorè NI, De Lorenzo R, Rancoita PMV, Cugnata F, Agresti A, Benedetti F, et al. CXCL10  
773 levels at hospital admission predict COVID-19 outcome: hierarchical assessment of 53  
774 putative inflammatory biomarkers in an observational study. *Mol Med* 2021;27:1–10.  
775 <https://doi.org/10.1186/S10020-021-00390-4/FIGURES/6>.
- 776 [36] Scheaffer SM, Lee D, Whitener B, Ying B, Wu K, Liang C-Y, et al. Bivalent SARS-CoV-2  
777 mRNA vaccines increase breadth of neutralization and protect against the BA.5 Omicron  
778 variant in mice. *Nat Med* 2022 2022:1–1. <https://doi.org/10.1038/s41591-022-02092-8>.
- 779 [37] Chalkias S, Harper C, Vrbicky K, Walsh SR, Essink B, Brosz A, et al. A Bivalent Omicron-  
780 Containing Booster Vaccine against Covid-19. *N Engl J Med* 2022;387.



- 781 <https://doi.org/10.1056/NEJMOA2208343>.
- 782 [38] Hassan AO, Feldmann F, Zhao H, Curiel DT, Okumura A, Tang-Huau TL, et al. A single  
783 intranasal dose of chimpanzee adenovirus-vectored vaccine protects against SARS-CoV-  
784 2 infection in rhesus macaques. *Cell Reports Med* 2021;2:100230.  
785 <https://doi.org/10.1016/J.XCRM.2021.100230>.
- 786 [39] Hassan AO, Kafai NM, Dmitriev IP, Fox JM, Smith BK, Harvey IB, et al. A Single-Dose  
787 Intranasal ChAd Vaccine Protects Upper and Lower Respiratory Tracts against SARS-  
788 CoV-2. *Cell* 2020;183:169-184.e13. <https://doi.org/10.1016/J.CELL.2020.08.026>.
- 789 [40] Bricker TL, Darling TL, Hassan AO, Harastani HH, Soung A, Jiang X, et al. A single  
790 intranasal or intramuscular immunization with chimpanzee adenovirus-vectored SARS-  
791 CoV-2 vaccine protects against pneumonia in hamsters. *Cell Rep* 2021;36.  
792 <https://doi.org/10.1016/J.CELREP.2021.109400>.
- 793 [41] Inhalable vaccine in trials n.d. <https://www.nature.com/articles/d42473-022-00043-y>  
794 (accessed November 3, 2022).
- 795 [42] Li J, Hou L, Guo X, Jin P, Wu S, Zhu J, et al. Heterologous AD5-nCOV plus CoronaVac  
796 versus homologous CoronaVac vaccination: a randomized phase 4 trial. *Nat Med* 2022  
797 282 2022;28:401–9. <https://doi.org/10.1038/s41591-021-01677-z>.
- 798 [43] Nooraei S, Bahrulolum H, Hoseini ZS, Katalani C, Hajizade A, Easton AJ, et al. Virus-like  
799 particles: preparation, immunogenicity and their roles as nanovaccines and drug  
800 nanocarriers. *J Nanobiotechnology* 2021 191 2021;19:1–27.  
801 <https://doi.org/10.1186/S12951-021-00806-7>.
- 802 [44] Tan TK, Rijal P, Rahikainen R, Keeble AH, Schimanski L, Hussain S, et al. A COVID-19  
803 vaccine candidate using SpyCatcher multimerization of the SARS-CoV-2 spike protein

- 804 receptor-binding domain induces potent neutralising antibody responses. *Nat Commun*  
805 2021;12:1–16. <https://doi.org/10.1038/s41467-020-20654-7>.
- 806 [45] Andrews N, Stowe J, Kirsebom F, Toffa S, Rickeard T, Gallagher E, et al. Covid-19  
807 Vaccine Effectiveness against the Omicron (B.1.1.529) Variant. *N Engl J Med*  
808 2022;386:1532–46.  
809 [https://doi.org/10.1056/NEJMOA2119451/SUPPL\\_FILE/NEJMOA2119451\\_DISCLOSUR](https://doi.org/10.1056/NEJMOA2119451/SUPPL_FILE/NEJMOA2119451_DISCLOSUR)  
810 ES.PDF.
- 811 [46] Ewer KJ, Barrett JR, Belij-Rammerstorfer S, Sharpe H, Makinson R, Morter R, et al. T cell  
812 and antibody responses induced by a single dose of ChAdOx1 nCoV-19 (AZD1222)  
813 vaccine in a phase 1/2 clinical trial. *Nat Med* 2021;27:270–8.  
814 <https://doi.org/10.1038/S41591-020-01194-5>.
- 815 [47] Tukhvatulin AI, Gordeychuk I V., Dolzhikova I V., Dzharullaeva AS, Krasina ME,  
816 Bayurova EO, et al. Immunogenicity and protectivity of intranasally delivered vector-  
817 based heterologous prime-boost COVID-19 vaccine Sputnik V in mice and non-human  
818 primates. *Emerg Microbes Infect* 2022;11:2229–47.  
819 <https://doi.org/10.1080/22221751.2022.2119169>.
- 820 [48] Seo SH, Jang Y. Cold-Adapted Live Attenuated SARS-Cov-2 Vaccine Completely  
821 Protects Human ACE2 Transgenic Mice from SARS-Cov-2 Infection. *Vaccines* 2020;8:1–  
822 17. <https://doi.org/10.3390/VACCINES8040584>.
- 823 [49] Schultz MD, Suschak JJ, Botta D, Silva-Sanchez A, King RG, Detchemendy TW, et al. A  
824 single intranasal administration of AdCOVID protects against SARS-CoV-2 infection in  
825 the upper and lower respiratory tracts. *Hum Vaccin Immunother* 2022.  
826 <https://doi.org/10.1080/21645515.2022.2127292>.
- 827 [50] King RG, Silva-Sanchez A, Peel JN, Botta D, Dickson AM, Pinto AK, et al. Single-Dose

- 828 Intranasal Administration of AdCOVID Elicits Systemic and Mucosal Immunity against  
829 SARS-CoV-2 and Fully Protects Mice from Lethal Challenge. *Vaccines* 2021;9.  
830 <https://doi.org/10.3390/VACCINES9080881>.
- 831 [51] Pérez P, Astorgano D, Albericio G, Flores S, Sánchez-Cordón PJ, Luczkowiak J, et al.  
832 Intranasal administration of a single dose of MVA-based vaccine candidates against  
833 COVID-19 induced local and systemic immune responses and protects mice from a lethal  
834 SARS-CoV-2 infection. *Front Immunol* 2022;13.  
835 <https://doi.org/10.3389/FIMMU.2022.995235>.
- 836 [52] Americo JL, Cotter CA, Earl PL, Liu R, Moss B. Intranasal inoculation of an MVA-based  
837 vaccine induces IgA and protects the respiratory tract of hACE2 mice from SARS-CoV-2  
838 infection. *Proc Natl Acad Sci U S A* 2022;119. <https://doi.org/10.1073/PNAS.2202069119>.
- 839 [53] An D, Li K, Rowe DK, Diaz MCH, Griffin EF, Beavis AC, et al. Protection of K18-hACE2  
840 mice and ferrets against SARS-CoV-2 challenge by a single-dose mucosal immunization  
841 with a parainfluenza virus 5-based COVID-19 vaccine. *Sci Adv* 2021;7.  
842 <https://doi.org/10.1126/SCIADV.ABI5246>.
- 843 [54] Cao H, Mai J, Zhou Z, Li Z, Duan R, Watt J, et al. Intranasal HD-Ad vaccine protects the  
844 upper and lower respiratory tracts of hACE2 mice against SARS-CoV-2. *Cell Biosci*  
845 2021;11. <https://doi.org/10.1186/S13578-021-00723-0>.
- 846 [55] Jiang L, Driedonks TAP, Jong WSP, Dhakal S, Bart van den Berg van Saparoea H,  
847 Sitaras I, et al. A bacterial extracellular vesicle-based intranasal vaccine against SARS-  
848 CoV-2 protects against disease and elicits neutralizing antibodies to wild-type and Delta  
849 variants. *J Extracell Vesicles* 2022;11:e12192. <https://doi.org/10.1002/JEV2.12192>.
- 850 [56] Vesin B, Lopez J, Noirat A, Authié P, Fert I, Le Chevalier F, et al. An intranasal lentiviral  
851 booster reinforces the waning mRNA vaccine-induced SARS-CoV-2 immunity that it

- 852 targets to lung mucosa 2022. <https://doi.org/10.1016/j.ymthe.2022.04.016>.
- 853 [57] Hassan AO, Shrihari S, Gorman MJ, Ying B, Yaun D, Raju S, et al. An intranasal vaccine  
854 durably protects against SARS-CoV-2 variants in mice. *Cell Rep* 2021;36:109452.  
855 <https://doi.org/10.1016/J.CELREP.2021.109452>.
- 856 [58] An X, Martinez-Paniagua M, Rezvan A, Sefat SR, Fathi M, Singh S, et al. Single-dose  
857 intranasal vaccination elicits systemic and mucosal immunity against SARS-CoV-2.  
858 *IScience* 2021;24:103037. <https://doi.org/10.1016/J.ISCI.2021.103037>.
- 859 [59] Lapuente D, Fuchs J, Willar J, Vieira Antão A, Eberlein V, Uhlig N, et al. Protective  
860 mucosal immunity against SARS-CoV-2 after heterologous systemic prime-mucosal  
861 boost immunization. *Nat Commun* 2021 121 2021;12:1–14.  
862 <https://doi.org/10.1038/s41467-021-27063-4>.
- 863 [60] Heinz FX, Stiasny K. Distinguishing features of current COVID-19 vaccines: knowns and  
864 unknowns of antigen presentation and modes of action. *Npj Vaccines* 2021 61 2021;6:1–  
865 13. <https://doi.org/10.1038/s41541-021-00369-6>.
- 866 [61] Sette A, Crotty S. Adaptive immunity to SARS-CoV-2 and COVID-19. *Cell* 2021;184:861–  
867 80. <https://doi.org/10.1016/J.CELL.2021.01.007>.
- 868 [62] Bertoletti A, Le Bert N, Tan AT. SARS-CoV-2-specific T cells in the changing landscape  
869 of the COVID-19 pandemic. *Immunity* 2022;55.  
870 <https://doi.org/10.1016/J.IMMUNI.2022.08.008>.
- 871 [63] Neidleman J, Luo X, McGregor M, Xie G, Murray V, Greene WC, et al. mRNA vaccine-  
872 induced T cells respond identically to SARS-CoV-2 variants of concern but differ in  
873 longevity and homing properties depending on prior infection status. *Elife* 2021;10.  
874 <https://doi.org/10.7554/ELIFE.72619>.



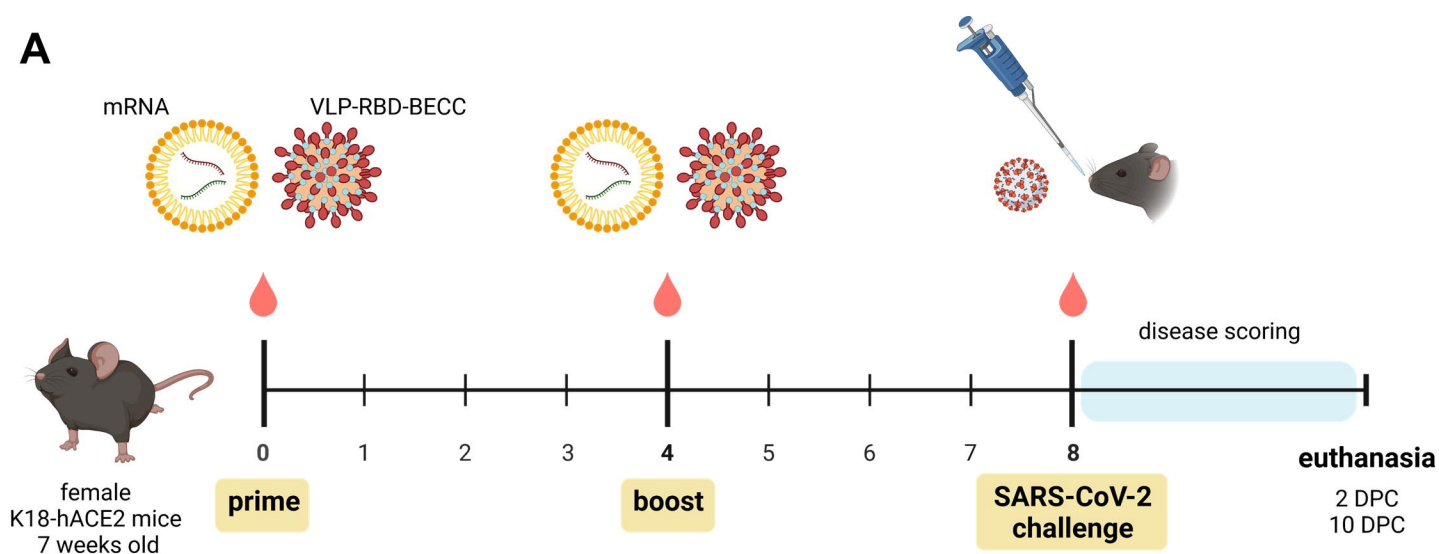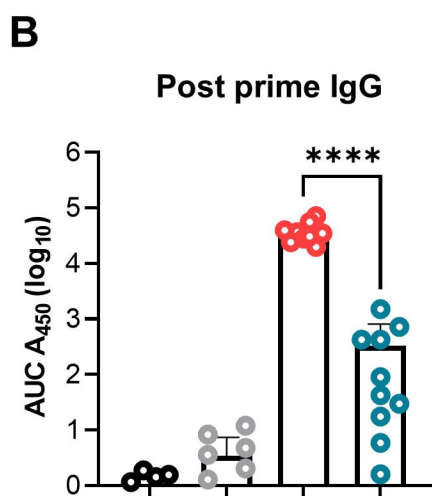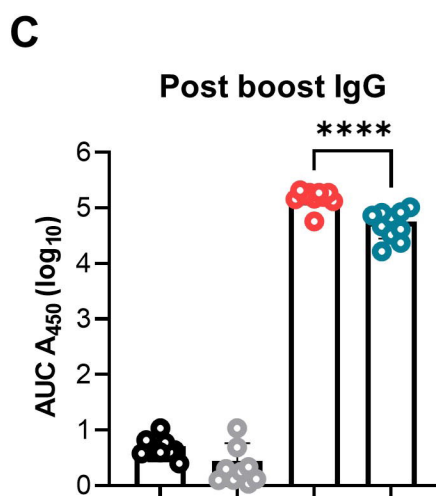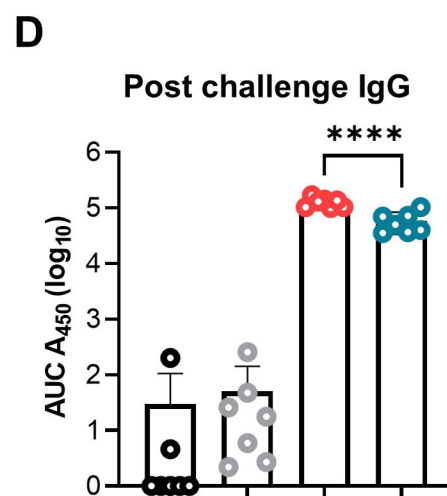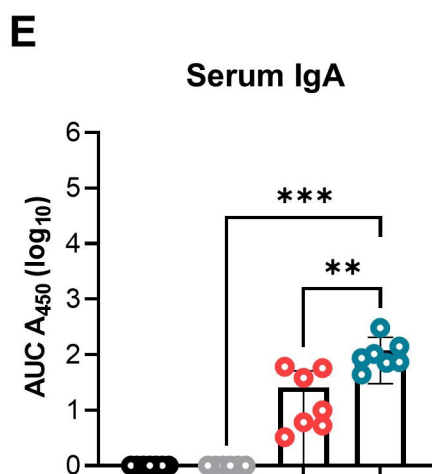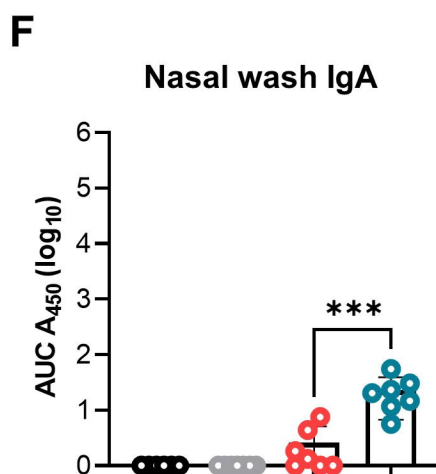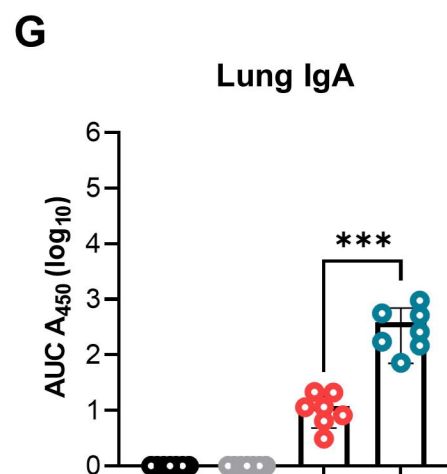

● NVNC ● NVC ● IM mRNA ● IN VLP-RBD-BECC

**A**

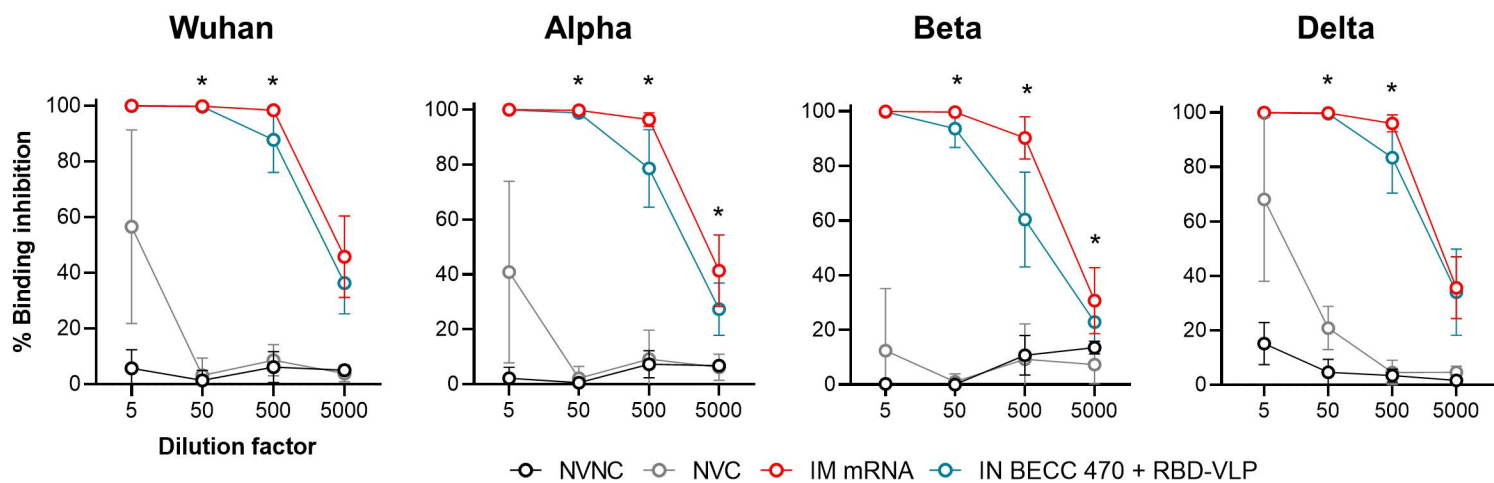

**B**

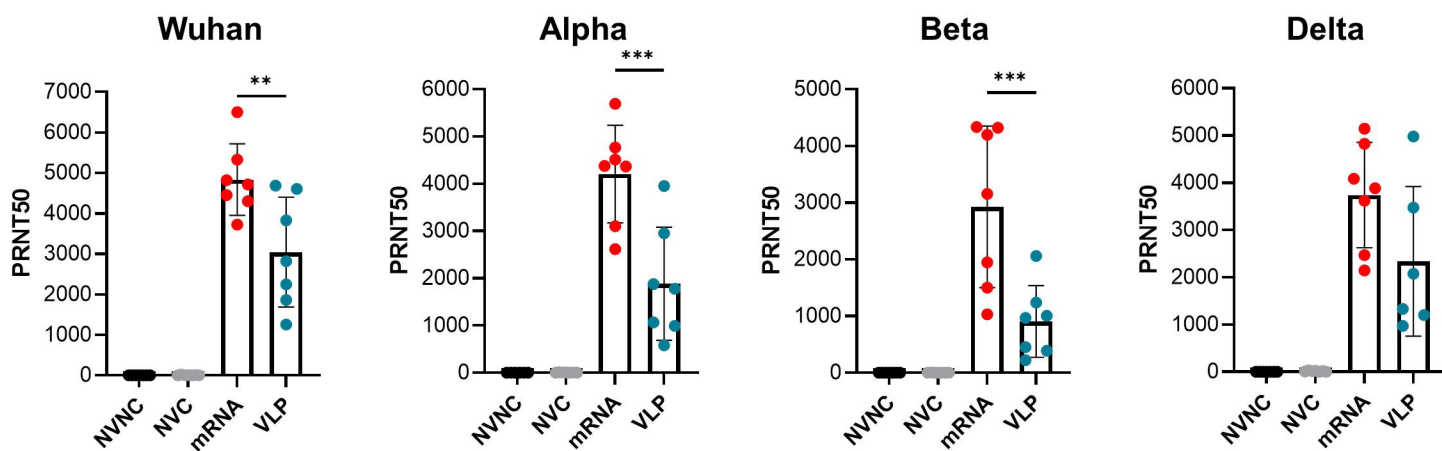

## Virus neutralization

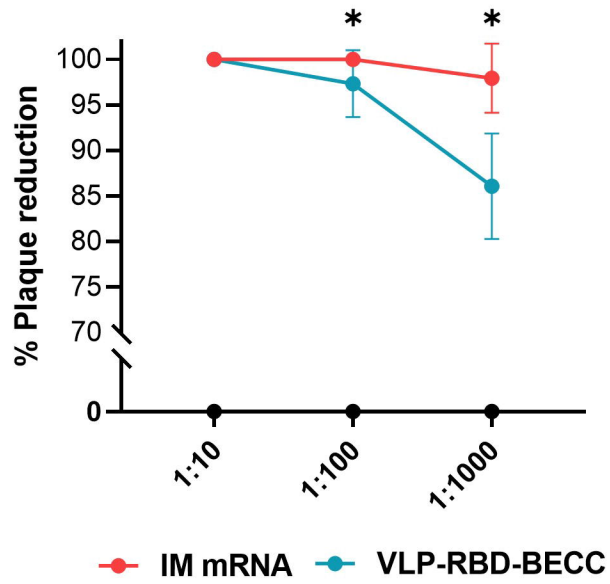



**A**

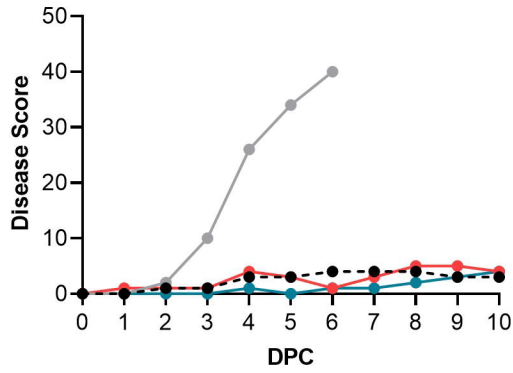

**B**

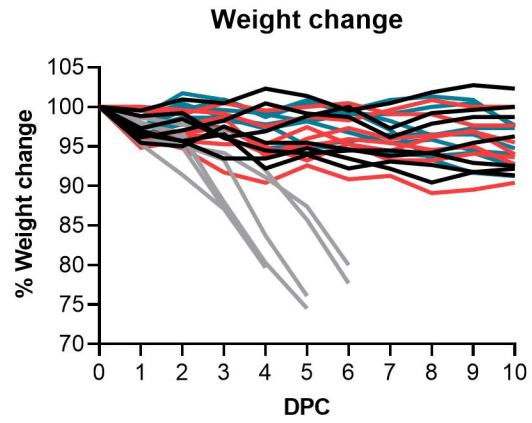

**C**

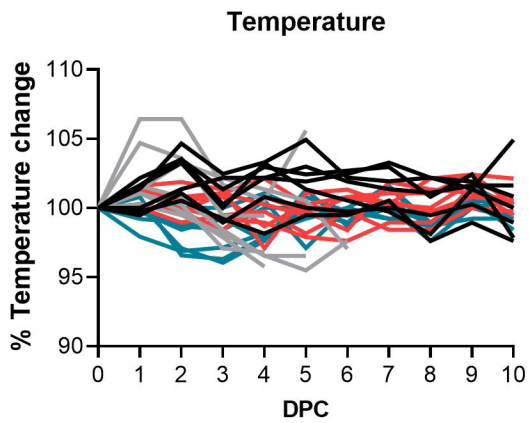

**D**

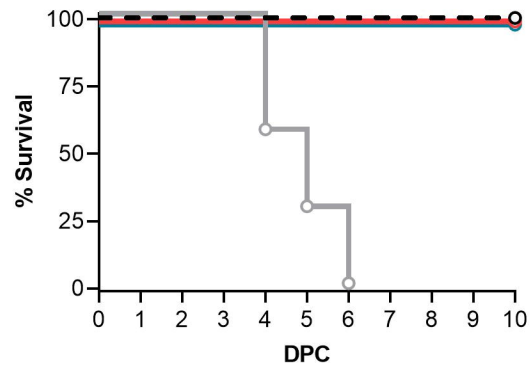

— NVNC — NVC — IM mRNA — IN VLP-RBD-BECC

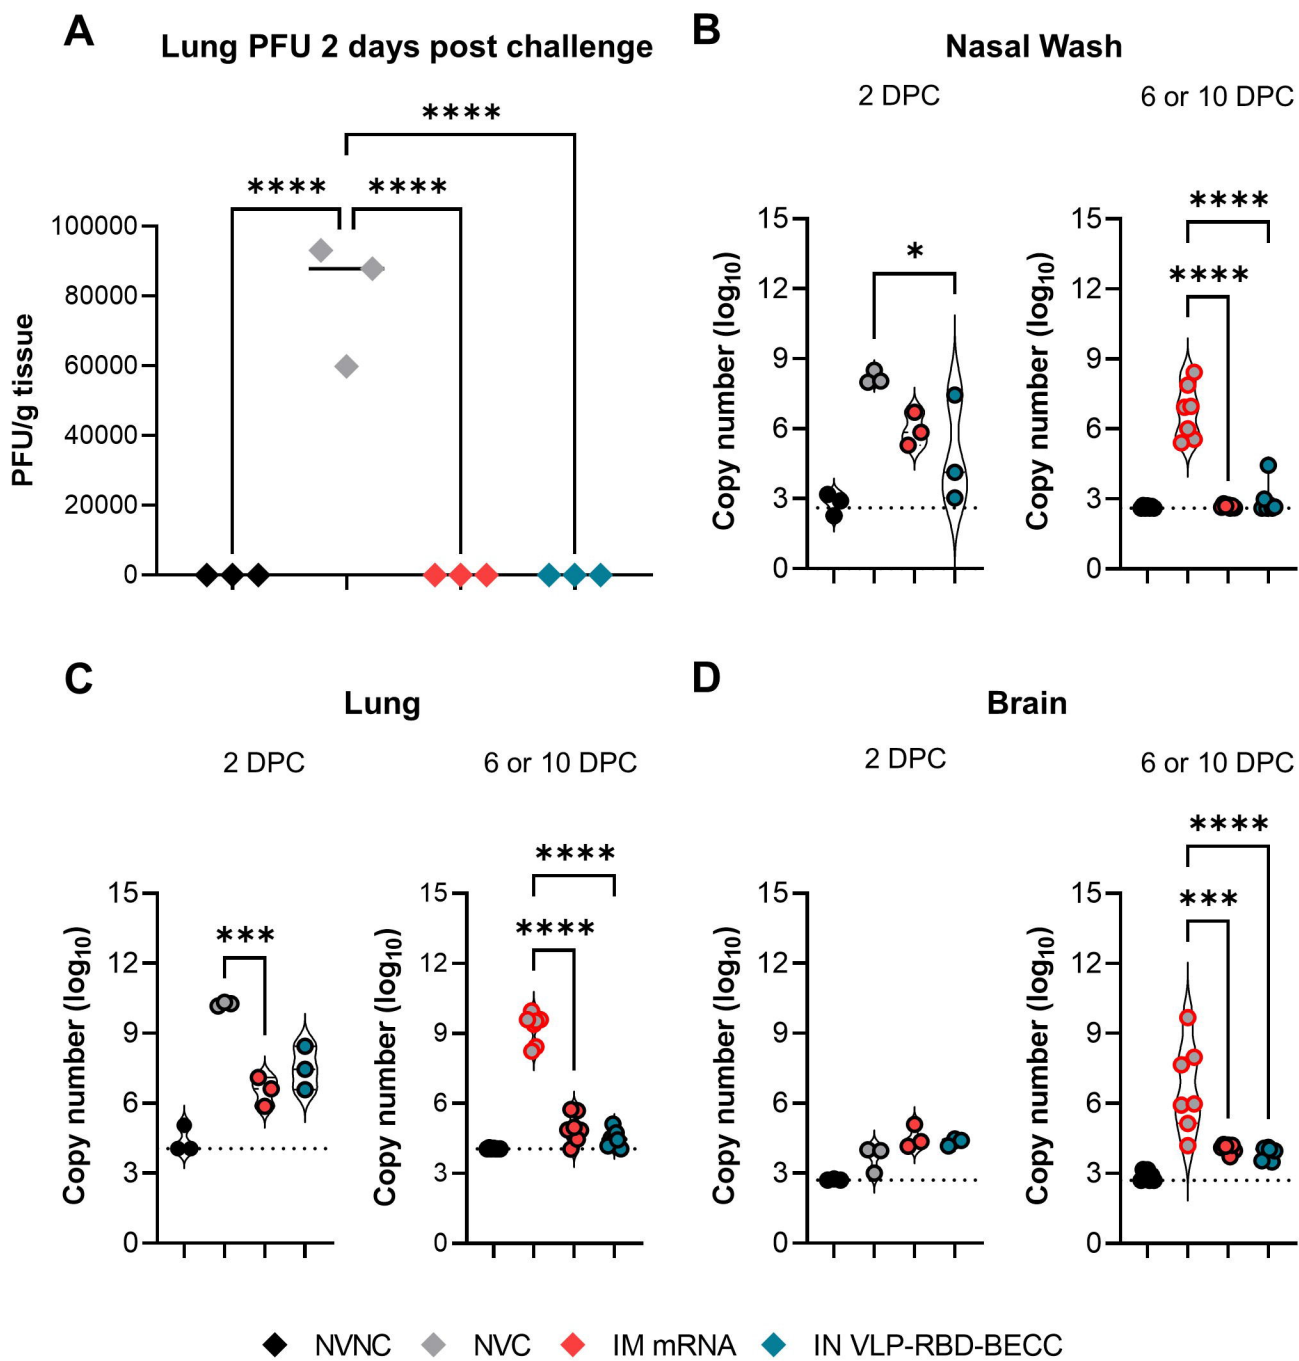

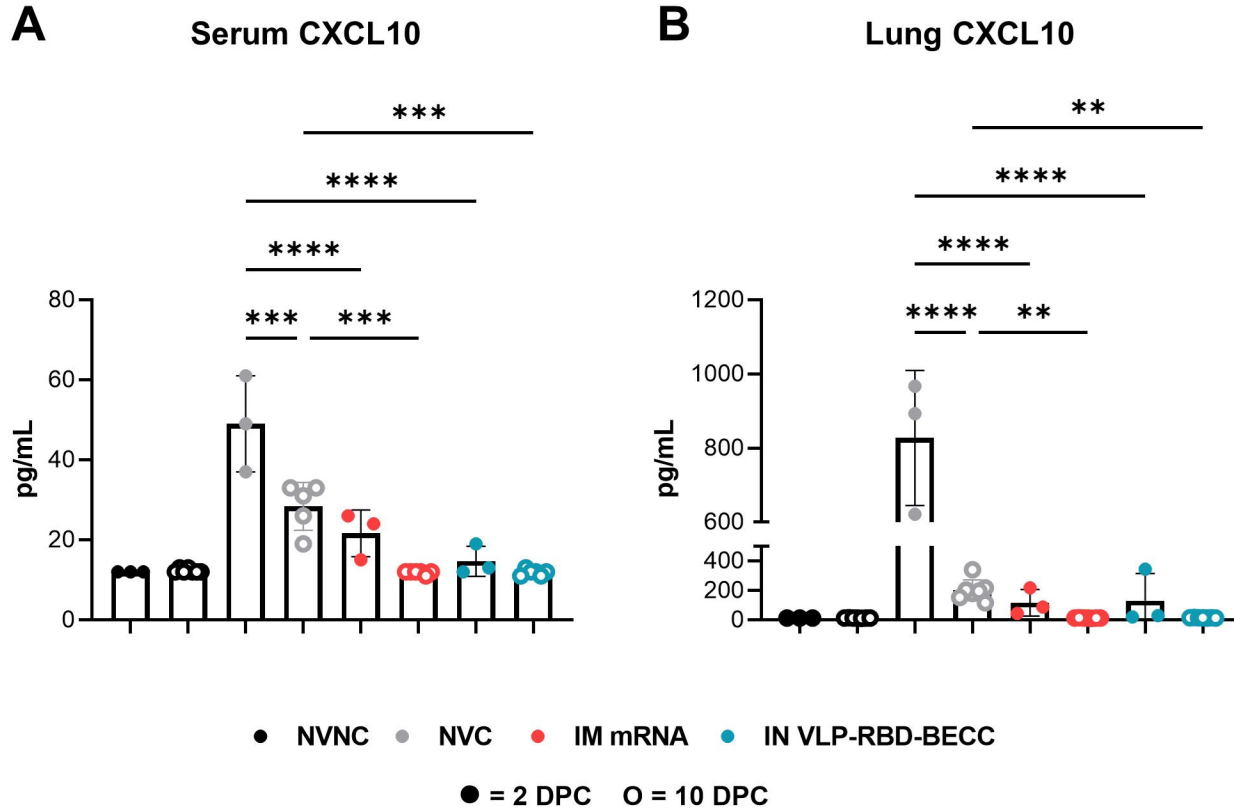

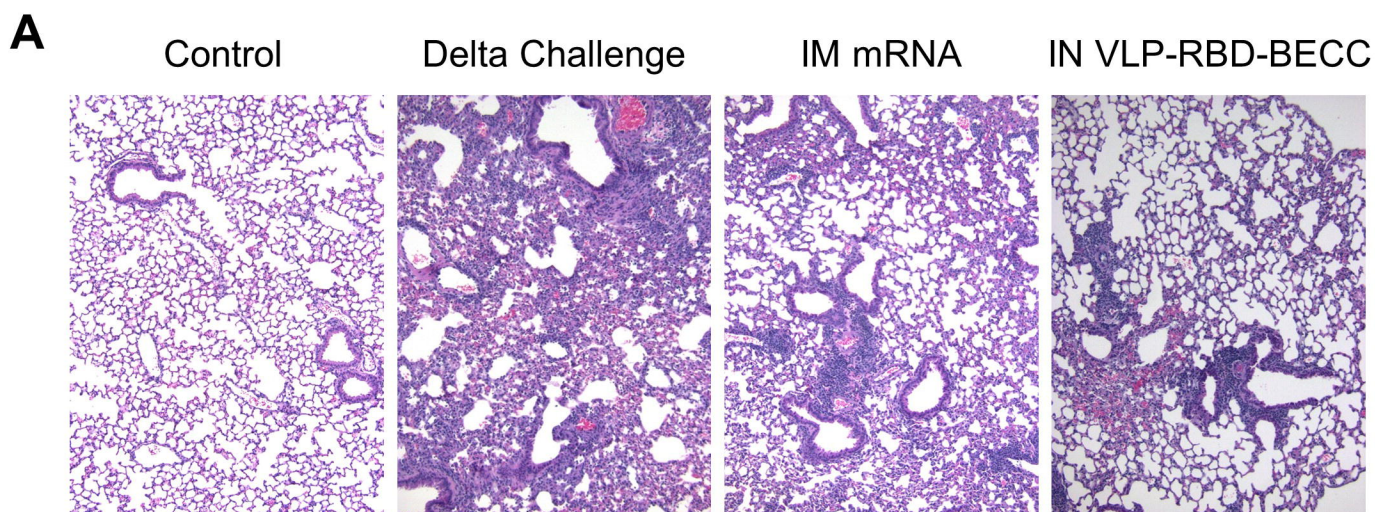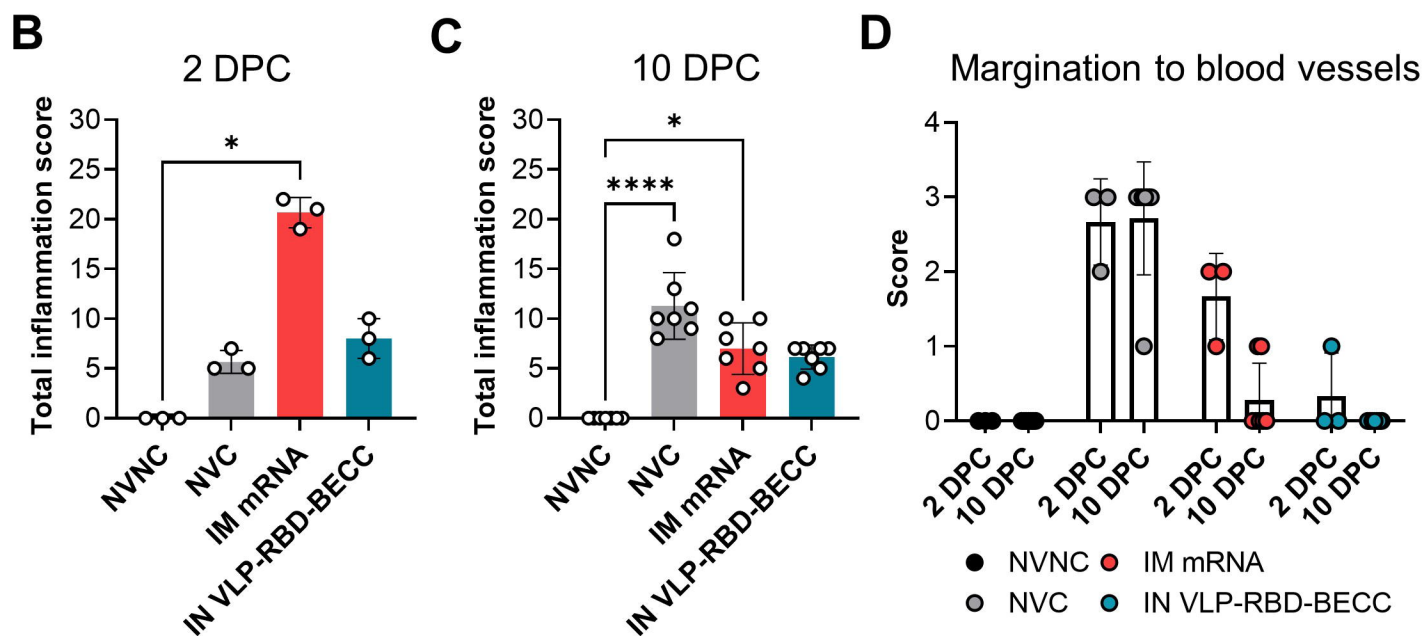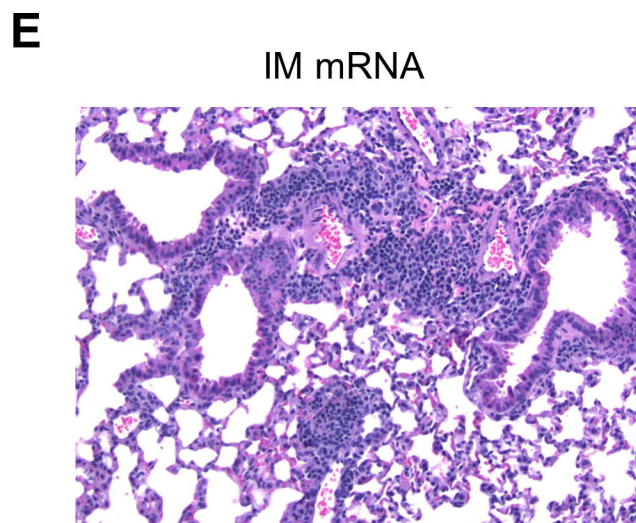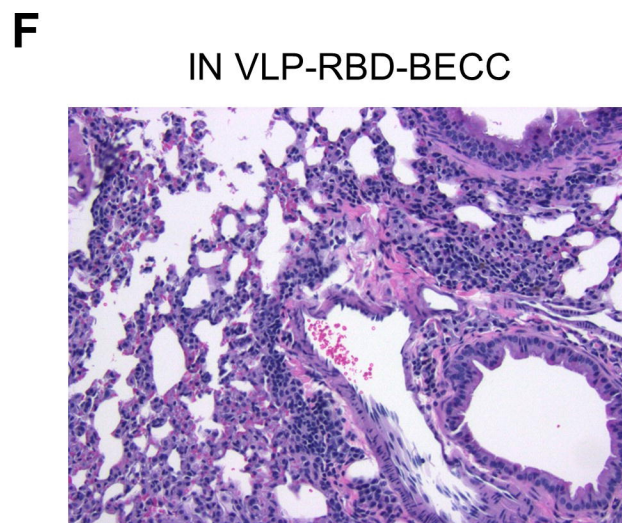

**A**

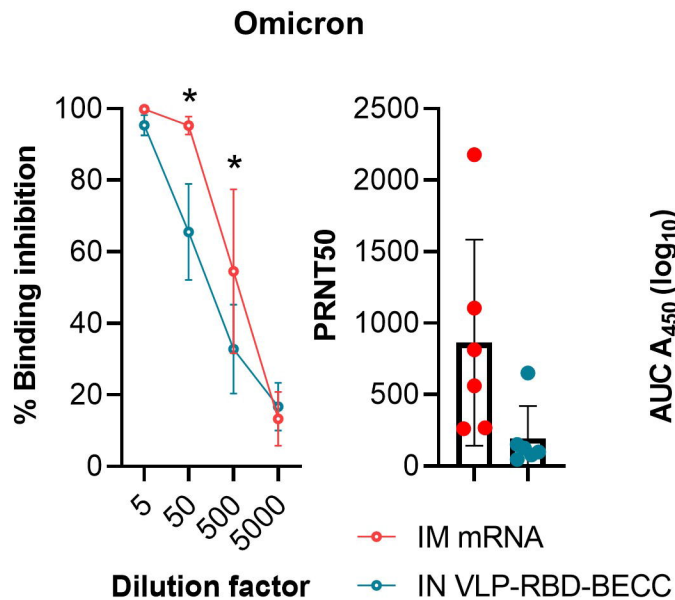

**B**

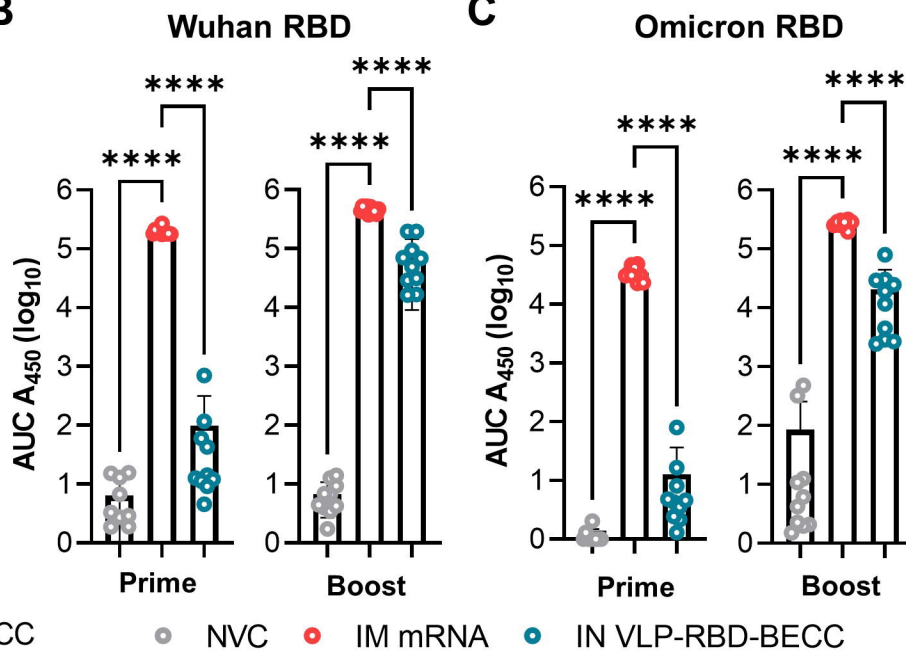

**C**

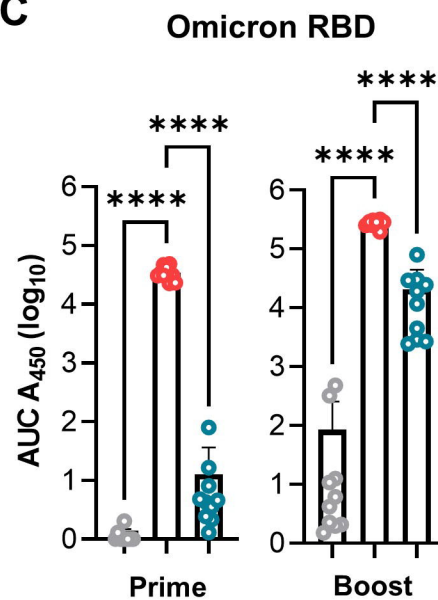

**D**

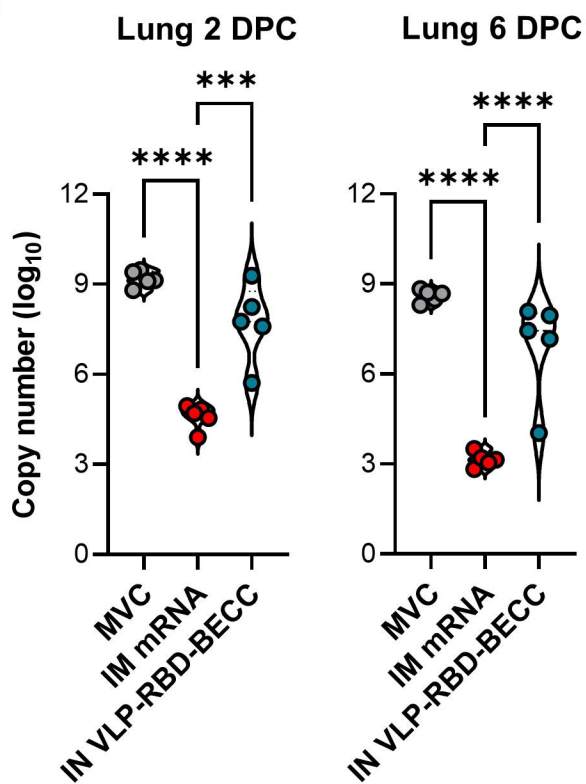

**E**

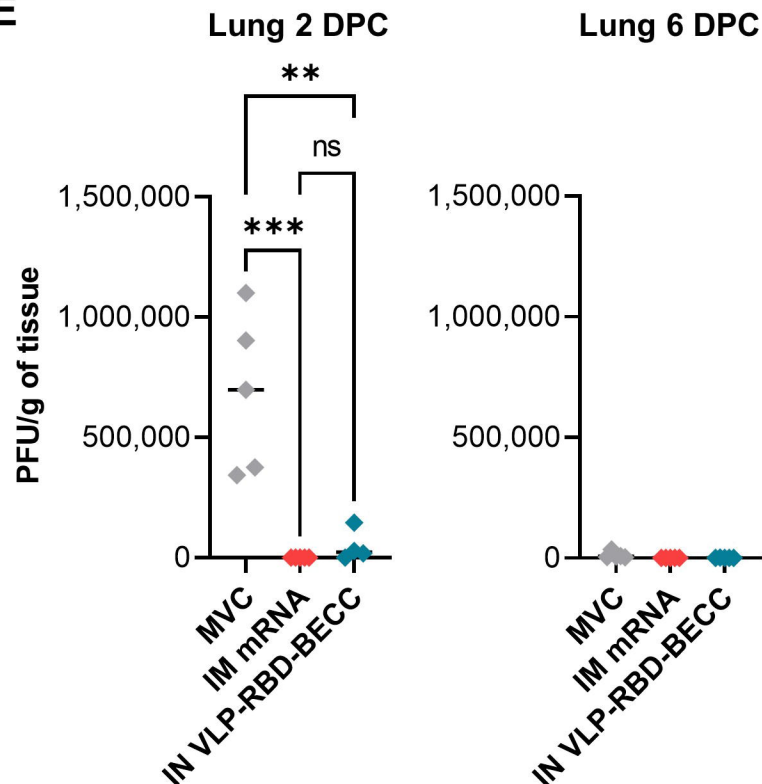

Source: https://www.biorxiv.org/content/10.1101/2023.04.25.538294v1.full.pdf
